# Supplementary material
Source: PubMed Central journal article supplement (PMC3924725)
Supplement: NIHMS539045-supplement-1_si_003.pdf [file NIHMS539045-supplement-1_si_003.pdf]

**Table 1S.** MT scoring result against a test set with 795 protein-ligand complexes.

| PDB ID | exp.        | MT                   | Original             | Glide       | Glide       |
|--------|-------------|----------------------|----------------------|-------------|-------------|
|        | $pK_d/pK_i$ | KECSA<br>$pK_d/pK_i$ | KECSA<br>$pK_d/pK_i$ | SP<br>Score | XP<br>Score |
| 2aac   | 2.22        | 2.664                | 4.9983               | -7.16       | -9.79       |
| 1ajp   | 2.23        | 2.5618               | 4.3331               | -6.75       | -5.21       |
| 1uto   | 2.27        | 2.0579               | 3.9891               | -7.05       | -5.92       |
| 1qi0   | 2.35        | 2.4075               | 3.6334               | -5.39       | -12         |
| 6rnt   | 2.37        | 2.8461               | 3.8767               | -4.97       | -4.76       |
| 1oba   | 2.44        | 1.322                | 3.5455               | -6.28       | -5.45       |
| 2i2b   | 2.44        | 3.8577               | 3.9796               | -7.36       | -8.09       |
| 1tok   | 2.47        | 1.8589               | 4.2685               | -7.14       | -8.39       |
| 1utl   | 2.47        | 2.3736               | 4.4362               | -7.09       | -6.49       |
| 1gyx   | 2.48        | 3.1484               | 4.3568               | -5.57       | -4.95       |
| 1ai4   | 2.5         | 3.098                | 4.4551               | -6.31       | -6.1        |
| 2r5a   | 2.6         | 1.9313               | 3.0037               | -3.87       | -4.64       |
| 1ajn   | 2.63        | 3.3015               | 4.0577               | -6.33       | -4.47       |
| 3bra   | 2.7         | 1.1787               | 3.2605               | -4.5        | -3.84       |
| 2vyt   | 2.74        | 1.7871               | 3.0085               | -3.75       | -4.58       |
| 2bet   | 2.77        | 2.3554               | 4.2042               | -8.21       | -8.67       |
| 2bza   | 2.8         | 2.631                | 5.062                | -7.29       | -7.05       |
| 3c2u   | 2.9         | 4.0518               | 4.214                | -6.3        | -11.34      |
| 2fw6   | 2.92        | 3.8584               | 4.6623               | -7.81       | -9.03       |
| 2fwp   | 2.92        | 3.8049               | 4.7006               | -7.5        | -9.42       |
| 1tng   | 2.93        | 2.6603               | 4.9782               | -6.8        | -4.81       |
| 1f4e   | 2.96        | 2.6468               | 3.8846               | -5.66       | -3.9        |
| 1ws4   | 3           | 2.6475               | 3.9207               | -7.19       | -6.57       |
| 2v3u   | 3           | 2.4526               | 5.397                | -6.66       | -10.14      |
| 1utm   | 3.01        | 2.0138               | 3.81                 | -7.13       | -6.36       |
| 1ogd   | 3.03        | 2.1464               | 4.3336               | -6.32       | -9.3        |
| 1ws5   | 3.03        | 2.553                | 3.9343               | -6.67       | -6.59       |
| 2ha3   | 3.03        | 1.92                 | 4.5787               | -6.59       | -5.85       |
| 1uj6   | 3.05        | 2.7876               | 4.5937               | -7.4        | -8.9        |
| 1y1z   | 3.08        | 2.8456               | 6.0871               | -8.29       | -9.6        |
| 1ugw   | 3.09        | 2.2677               | 4.0581               | -6.41       | -6.47       |
| 3buf   | 3.1         | 1.327                | 3.3187               | -5.77       | -3.69       |
| 3c2r   | 3.11        | 3.1391               | 4.5721               | -5.68       | -6.26       |
| 1lbk   | 3.18        | 4.4072               | 4.6701               | -6.47       | -4.62       |
| 1br6   | 3.22        | 5.6011               | 4.4857               | -7.36       | -8.66       |
| 1e6s   | 3.22        | 3.4856               | 5.0717               | -5.15       | -7.89       |
| 1tog   | 3.22        | 2.9479               | 4.8069               | -8.86       | -10.16      |

|      |      |        |        |        |        |
|------|------|--------|--------|--------|--------|
| 2ri9 | 3.22 | 1.1861 | 3.6465 | -5.57  | -5.27  |
| 1v2j | 3.25 | 2.9949 | 5.4962 | -7.82  | -7.36  |
| 5yas | 3.26 | 1.6923 | 5.0446 | -6.62  | -8.18  |
| 1bcu | 3.28 | 3.4763 | 4.0763 | -7.18  | -5.52  |
| 1phw | 3.3  | 1.4194 | 3.7255 | -6.09  | -6.23  |
| 3c2o | 3.35 | 2.9645 | 4.3105 | -6.45  | -7.61  |
| 1tnh | 3.37 | 2.6968 | 5.254  | -7.39  | -6.8   |
| 1v2u | 3.37 | 2.9762 | 5.0853 | -7.99  | -7.38  |
| 1toj | 3.39 | 2.6151 | 4.6102 | -8.83  | -10.89 |
| 1uz4 | 3.4  | 3.2105 | 5.1311 | -9.22  | -11.13 |
| 2sim | 3.42 | 3.5835 | 4.1985 | -7.37  | -9.91  |
| 1c5o | 3.49 | 2.6805 | 4.6251 | -8.62  | -7.3   |
| 1utn | 3.49 | 2.6387 | 5.2782 | -7.16  | -6.31  |
| 1jys | 3.52 | 3.0372 | 3.5004 | -5.77  | -5.69  |
| 1v2r | 3.55 | 4.4335 | 4.3488 | -8.69  | -9.32  |
| 2cle | 3.55 | 4.5067 | 5.3899 | -9.44  | -8.37  |
| 2clf | 3.55 | 4.4571 | 5.3387 | -10.24 | -10.05 |
| 1nli | 3.59 | 3.5657 | 5.4153 | -8.95  | -8.89  |
| 1d7i | 3.6  | 1.5447 | 4.4839 | -5.46  | -3.12  |
| 3jdw | 3.6  | 1.6128 | 4.4861 | -5.08  | -6.84  |
| 1pb9 | 3.62 | 2.4378 | 6.0303 | -6.65  | -6.35  |
| 1gyy | 3.64 | 3.4519 | 4.404  | -5.48  | -5.39  |
| 2azr | 3.64 | 4.4901 | 5.0089 | -8.8   | -7.81  |
| 2v00 | 3.66 | 3.6029 | 4.7129 | -5.71  | -4.56  |
| 3buh | 3.66 | 2.256  | 4.3891 | -5.46  | -5.18  |
| 1c3x | 3.68 | 3.0748 | 6.0796 | -6.73  | -5.39  |
| 2a8g | 3.69 | 4.3846 | 4.5471 | -7.14  | -8.75  |
| 3clp | 3.69 | 4.7725 | 5.0314 | -9.12  | -8.44  |
| 1loq | 3.7  | 3.2514 | 4.9435 | -9.22  | -9.96  |
| 1wht | 3.7  | 4.4305 | 4.8214 | -7.06  | -6.92  |
| 2bvr | 3.7  | 5.0684 | 4.9803 | -7.49  | -9.38  |
| 2fx6 | 3.7  | 3.8329 | 5.3124 | -7.51  | -5.37  |
| 2vfk | 3.71 | 3.3798 | 3.8172 | -6.75  | -6.97  |
| 1ai5 | 3.72 | 3.4875 | 4.4963 | -6.45  | -4.52  |
| 1nje | 3.8  | 3.3778 | 4.7316 | -6.62  | -5.61  |
| 2hb1 | 3.8  | 3.3349 | 4.531  | -8.3   | -7.08  |
| 1j16 | 3.84 | 2.7019 | 4.9749 | -7.37  | -8.8   |
| 1utj | 3.84 | 2.4912 | 4.8234 | -6.86  | -6.01  |
| 1n1t | 3.85 | 3.662  | 4.1336 | -8.38  | -10.97 |
| 1aj7 | 3.87 | 4.285  | 4.4864 | -7.55  | -7.89  |
| 1x9d | 3.96 | 3.593  | 4.8447 | -6.33  | -10.03 |

|      |      |        |        |        |        |
|------|------|--------|--------|--------|--------|
| 2fpz | 3.96 | 3.7076 | 5.323  | -7.34  | -4.71  |
| 2wec | 3.96 | 5.7327 | 5.3741 | -7.89  | -8.88  |
| 2g8r | 3.99 | 2.8193 | 3.6667 | -5.43  | -4.08  |
| 1lgw | 4    | 2.2854 | 5.5125 | -6.75  | -6.17  |
| 1tni | 4    | 3.3404 | 5.3365 | -6.42  | -6.32  |
| 2qrl | 4    | 1.5169 | 3.5876 | -5.75  | -6.42  |
| 1c5z | 4.01 | 2.767  | 4.8807 | -8.34  | -7.91  |
| 1v2w | 4.01 | 4.1789 | 4.4761 | -7.08  | -9.77  |
| 3bxh | 4.03 | 3.1856 | 4.9442 | -7.93  | -11.41 |
| 1toi | 4.05 | 2.6407 | 4.5148 | -8.55  | -10.65 |
| 1tuf | 4.05 | 3.0791 | 4.3788 | -2.68  | -3.34  |
| 2clh | 4.06 | 5.0958 | 5.6612 | -11.47 | -9.92  |
| 1n2v | 4.08 | 3.5139 | 4.1695 | -8.46  | -6.31  |
| 1c5t | 4.1  | 3.2095 | 4.8202 | -8.9   | -7.98  |
| 1odj | 4.1  | 4.8533 | 5.1038 | -7.55  | -8.02  |
| 2bvs | 4.1  | 6.478  | 5.1266 | -9.42  | -9.18  |
| 1p19 | 4.11 | 3.2932 | 4.187  | -8.84  | -9.7   |
| 2exm | 4.11 | 3.3649 | 3.9628 | -7.75  | -7.69  |
| 1v2q | 4.13 | 4.1032 | 4.2877 | -7.65  | -9.63  |
| 1v2s | 4.17 | 2.9064 | 5.1919 | -8.18  | -7.49  |
| 1c5y | 4.2  | 3.4784 | 5.3927 | -9.85  | -8.08  |
| 1c87 | 4.2  | 4.4577 | 5.5213 | -8.86  | -9.53  |
| 1ghw | 4.2  | 4.7093 | 5.1347 | -10.39 | -9.85  |
| 1odi | 4.21 | 5.1161 | 5.2126 | -8.09  | -7.62  |
| 1pzi | 4.22 | 2.8275 | 3.7161 | -6.04  | -6.88  |
| 1ua4 | 4.22 | 4.407  | 4.357  | -11.74 | -15.09 |
| 2bes | 4.24 | 2.7484 | 4.5673 | -6.89  | -10.28 |
| 1li3 | 4.25 | 2.1262 | 4.9108 | -6.58  | -7.86  |
| 2qrk | 4.26 | 4.0134 | 3.8684 | -5.37  | -4.82  |
| 1e2l | 4.29 | 4.1337 | 5.2282 | -10.2  | -10.39 |
| 1v2l | 4.29 | 2.825  | 4.9717 | -7.8   | -7.09  |
| 1det | 4.3  | 3.1363 | 3.1401 | -8.87  | -11.79 |
| 1w3k | 4.3  | 3.7197 | 4.8076 | -6.93  | -13.84 |
| 2cli | 4.3  | 4.7232 | 5.6771 | -10.82 | -9.5   |
| 1ajq | 4.31 | 2.9927 | 5.5685 | -7.13  | -5.77  |
| 2tpi | 4.31 | 4.9528 | 5.1265 | -7.41  | -6.99  |
| 2ha6 | 4.32 | 4.2299 | 3.8678 | -7.42  | -10.41 |
| 4rsk | 4.32 | 2.7314 | 3.6839 | -5.1   | -5.79  |
| 1e3v | 4.34 | 2.7264 | 4.9337 | -6.06  | -5.83  |
| 1z6s | 4.34 | 3.3092 | 3.9128 | -5.57  | -5.96  |
| 2ha5 | 4.34 | 1.9819 | 3.8873 | -4.98  | -6.98  |

|      |      |        |        |        |        |
|------|------|--------|--------|--------|--------|
| 1ghv | 4.35 | 4.4051 | 4.6555 | -10.12 | -10.05 |
| 1sv3 | 4.35 | 2.3754 | 3.9835 | -6.18  | -4.45  |
| 1bhf | 4.38 | 6.9337 | 4.2348 | -7.99  | -10.3  |
| 2hjb | 4.39 | 3.6023 | 5.3495 | -7.99  | -7.31  |
| 1p57 | 4.4  | 4.3767 | 4.6952 | -8.74  | -7.91  |
| 2pwd | 4.4  | 2.8279 | 5.5879 | -8.03  | -8.12  |
| 1no6 | 4.41 | 4.1804 | 4.7616 | -6.84  | -10.04 |
| 2pu2 | 4.43 | 4.028  | 4.1793 | -7.25  | -7.2   |
| 2r2w | 4.47 | 5.233  | 5.2435 | -9.48  | -9.84  |
| 1qan | 4.48 | 7.0459 | 5.4016 | -10.45 | -10.39 |
| 2ogy | 4.48 | 4.8465 | 4.3359 | -6.41  | -6.57  |
| 1j14 | 4.49 | 2.8264 | 5.4131 | -8.23  | -8.83  |
| 1gi7 | 4.51 | 4.0084 | 4.4706 | -10.42 | -9.91  |
| 1gul | 4.52 | 3.4531 | 5.3608 | -7.3   | -7.36  |
| 2a4m | 4.52 | 2.9806 | 4.4376 | -7.63  | -5.37  |
| 1fj4 | 4.59 | 4.077  | 5.247  | -6.86  | -5.52  |
| 1l2s | 4.59 | 3.6943 | 4.6801 | -5.89  | -5.17  |
| 2jiw | 4.59 | 4.325  | 5.6277 | -9.22  | -10.01 |
| 1pa9 | 4.6  | 3.7412 | 5.1317 | -8.87  | -7.82  |
| 1upf | 4.6  | 1.7618 | 3.5925 | -6.06  | -4.75  |
| 2ha2 | 4.66 | 4.0173 | 3.9433 | -6.12  | -8.61  |
| 2nsl | 4.68 | 4.3015 | 4.7873 | -9.96  | -9.87  |
| 1c5n | 4.7  | 2.8839 | 6.1171 | -8.45  | -6.28  |
| 1c86 | 4.7  | 4.7345 | 5.7959 | -9.74  | -10.72 |
| 2j9n | 4.7  | 2.9922 | 5.5094 | -8.42  | -7.68  |
| 2qfo | 4.7  | 2.1037 | 3.9792 | -6.92  | -4.61  |
| 3kiv | 4.7  | 2.4156 | 4.6704 | -5.19  | -7.19  |
| 1v2t | 4.71 | 3.9998 | 4.2367 | -9.39  | -10.65 |
| 1v2o | 4.73 | 4.2498 | 4.3952 | -8.61  | -10.04 |
| 1ce5 | 4.74 | 3.0286 | 5.3831 | -8.28  | -7.16  |
| 1w4p | 4.74 | 2.8825 | 3.8669 | -5.92  | -6.47  |
| 1q8t | 4.76 | 3.9201 | 4.7309 | -9.09  | -8.09  |
| 2b4l | 4.77 | 2.884  | 4.9468 | -8.83  | -7.22  |
| 1oss | 4.79 | 2.5775 | 4.9359 | -6.11  | -3.77  |
| 2nsj | 4.79 | 4.8625 | 4.8344 | -10.05 | -7.24  |
| 1bjv | 4.8  | 4.5546 | 4.6839 | -8.05  | -8.53  |
| 2nta | 4.8  | 5.2282 | 5.7505 | -5.76  | -4.99  |
| 1aid | 4.82 | 3.2879 | 5.6256 | -6.5   | -6.16  |
| 1v1j | 4.82 | 3.4875 | 5.2915 | -7.13  | -7.49  |
| 1xff | 4.82 | 3.7152 | 5.2545 | -10.92 | -14.6  |
| 2gl0 | 4.82 | 4.5895 | 4.4237 | -7.6   | -9.32  |

|      |      |        |        |        |        |
|------|------|--------|--------|--------|--------|
| 2pwg | 4.82 | 3.2875 | 5.3987 | -8.7   | -10.14 |
| 1c83 | 4.85 | 5.411  | 5.4174 | -9.02  | -10.26 |
| 1ecv | 4.85 | 4.6006 | 6.3895 | -8.75  | -10.52 |
| 1xgi | 4.85 | 4.2198 | 4.6665 | -6.8   | -5.17  |
| 3cj2 | 4.85 | 3.1582 | 4.0867 | -5.49  | -5.04  |
| 2brb | 4.86 | 4.9193 | 4.6436 | -7.15  | -6.86  |
| 1p1q | 4.89 | 3.8382 | 5.1087 | -9.1   | -10.55 |
| 2j77 | 4.89 | 3.1985 | 5.3591 | -6.75  | -9.94  |
| 3cf8 | 4.9  | 3.8902 | 4.4236 | -7.65  | -10.55 |
| 1bzc | 4.92 | 6.6344 | 5.4375 | -8.88  | -10.99 |
| 1e1v | 4.92 | 4.3913 | 4.8383 | -9.04  | -9.24  |
| 1h1p | 4.92 | 3.9363 | 4.2877 | -9.63  | -9.21  |
| 1jqy | 4.92 | 4.9842 | 4.4694 | -6.54  | -7.73  |
| 1e2k | 4.94 | 4.3077 | 5.1935 | -8.33  | -7.31  |
| 2gss | 4.94 | 2.6242 | 3.4028 | -4.93  | -5.48  |
| 1cea | 4.96 | 2.3517 | 4.6516 | -6.47  | -9.31  |
| 1o5g | 4.96 | 6.2261 | 5.6591 | -11.35 | -9.98  |
| 1tsy | 4.96 | 3.8247 | 4.8436 | -6.43  | -6.45  |
| 3bxg | 4.96 | 3.3732 | 5.1428 | -8.28  | -11.59 |
| 1c84 | 5    | 5.3155 | 5.4324 | -8.94  | -10.97 |
| 1nc3 | 5    | 6.012  | 5.1303 | -10.2  | -12.38 |
| 2oym | 5    | 4.8272 | 4.6149 | -8.75  | -10.09 |
| 2glp | 5.01 | 6.4223 | 4.8642 | -7.61  | -6.54  |
| 2d0k | 5.02 | 5.4436 | 4.03   | -7.18  | -6.72  |
| 3bgc | 5.02 | 9.039  | 6.6143 | -10.6  | -12.01 |
| 2qt5 | 5.03 | 4.8149 | 3.8697 | -7.44  | -8.55  |
| 2c3l | 5.07 | 4.2388 | 5.0046 | -8.66  | -8.29  |
| 1enu | 5.08 | 3.6426 | 4.4822 | -9.55  | -8.46  |
| 2qtg | 5.08 | 5.0473 | 5.4328 | -8.51  | -7.5   |
| 1m48 | 5.09 | 5.7454 | 5.101  | -7.14  | -7.29  |
| 1nw7 | 5.09 | 5.3015 | 4.5902 | -9.53  | -10.97 |
| 1od8 | 5.1  | 4.2815 | 4.8132 | -7.67  | -10.2  |
| 1onz | 5.1  | 4.2523 | 4.5169 | -7.19  | -7.06  |
| 1v0k | 5.1  | 3.5742 | 4.6945 | -6.91  | -10.25 |
| 1w7g | 5.1  | 5.52   | 5.7493 | -8.3   | -8.09  |
| 1k4h | 5.11 | 4.5867 | 4.7998 | -8.86  | -8.83  |
| 2web | 5.12 | 7.7628 | 5.8491 | -8.08  | -8.83  |
| 1gcz | 5.13 | 5.3632 | 5.2819 | -4.97  | -6     |
| 2brl | 5.14 | 5.3134 | 4.3464 | -7.16  | -7.17  |
| 1pb8 | 5.15 | 2.4005 | 5.5213 | -7.49  | -10.66 |
| 1s38 | 5.15 | 4.3545 | 5.6095 | -8.67  | -8.44  |

|      |      |        |        |        |        |
|------|------|--------|--------|--------|--------|
| 1thz | 5.15 | 5.1262 | 4.7681 | -6.46  | -5.09  |
| 2f5t | 5.17 | 5.1228 | 5.1776 | -9.56  | -19.08 |
| 3b7j | 5.17 | 2.6927 | 4.1947 | -6.25  | -7.23  |
| 1ocq | 5.19 | 3.9107 | 4.8855 | -6.94  | -12.4  |
| 1rnt | 5.19 | 3.6469 | 4.1748 | -10.96 | -13.1  |
| 1j17 | 5.22 | 8.0626 | 6.3164 | -8     | -6.97  |
| 1o5c | 5.22 | 5.4245 | 5.4365 | -10.56 | -10.86 |
| 1w4o | 5.22 | 3.0231 | 4.0959 | -6.8   | -7.48  |
| 2hxm | 5.22 | 5.4535 | 4.4156 | -8.89  | -8.76  |
| 1fh7 | 5.24 | 4.2526 | 5.058  | -8.19  | -12.61 |
| 2jfz | 5.24 | 7.1965 | 5.2545 | -8.51  | -8.21  |
| 1w4q | 5.26 | 3.7663 | 4.4614 | -6.79  | -6.45  |
| 1b46 | 5.28 | 7.3161 | 5.6057 | -10.64 | -13.2  |
| 1c88 | 5.29 | 4.9541 | 5.9343 | -9.4   | -9.38  |
| 1a69 | 5.3  | 4.7415 | 5.1567 | -7.4   | -7.63  |
| 1pr1 | 5.3  | 4.084  | 4.8786 | -6.77  | -8.36  |
| 1srg | 5.3  | 6.6561 | 5.5636 | -8.5   | -4.48  |
| 1vyq | 5.3  | 5.3695 | 5.2581 | -8.56  | -9.55  |
| 1xbb | 5.3  | 5.2093 | 4.8339 | -7.17  | -10.04 |
| 2oyk | 5.3  | 3.96   | 4.075  | -7.06  | -9.68  |
| 1lvu | 5.32 | 5.3615 | 4.7289 | -8.14  | -8.77  |
| 1y20 | 5.32 | 2.6125 | 6.2781 | -7.76  | -6.52  |
| 2c80 | 5.33 | 6.1543 | 5.0641 | -8.26  | -9.87  |
| 1zgi | 5.34 | 5.34   | 5.4515 | -7.48  | -8.87  |
| 2fxv | 5.35 | 4.9427 | 4.7541 | -9.64  |        |
| 1adl | 5.36 | 3.6317 | 4.0036 | -4.93  | -5.75  |
| 1sgu | 5.37 | 8.4166 | 6.3141 | -11.58 | -9.15  |
| 1qbv | 5.39 | 6.979  | 5.0251 | -9.35  | -8.08  |
| 2h6b | 5.39 | 3.1212 | 4.9285 | -9.41  | -9.77  |
| 1bp0 | 5.4  | 3.2799 | 4.5452 | -8.77  | -10.85 |
| 1r9l | 5.4  | 2.8799 | 5.2399 | -9.78  | -8.41  |
| 2c1p | 5.4  | 5.3055 | 4.964  | -8.33  | -8.19  |
| 2f35 | 5.4  | 3.4295 | 4.0045 | -6.11  | -5.8   |
| 2i80 | 5.4  | 5.4206 | 5.9317 | -7.67  | -8.76  |
| 2qg2 | 5.4  | 5.5415 | 4.4649 | -9.03  | -8.95  |
| 3b4p | 5.4  | 4.3024 | 5.1047 | -7.49  | -10.81 |
| 2j47 | 5.41 | 6.0606 | 5.3751 | -7.63  | -9.35  |
| 1gja | 5.42 | 4.758  | 4.7325 | -9.65  | -10.66 |
| 1syi | 5.44 | 5.2207 | 5.795  | -10.32 | -12.39 |
| 2iko | 5.45 | 5.4642 | 5.1877 | -7.38  | -5.55  |
| 1lv8 | 5.46 | 5.2092 | 4.7339 | -6.93  | -5.57  |

|      |      |        |        |        |        |
|------|------|--------|--------|--------|--------|
| 1q65 | 5.46 | 4.6949 | 4.975  | -8.68  | -8.56  |
| 1gi1 | 5.47 | 4.3863 | 4.8842 | -8.59  | -9.48  |
| 1o2s | 5.47 | 4.4604 | 4.6684 | -9.49  | -8.85  |
| 1g85 | 5.48 | 1.6341 | 2.9503 | -4.46  | -5.11  |
| 1pot | 5.49 | 4.2313 | 5.6946 | -8.47  | -12.46 |
| 2h4k | 5.49 | 4.1867 | 4.6617 | -8.37  | -9.03  |
| 2o0u | 5.49 | 7.3414 | 6.0676 | -10.49 | -9.13  |
| 3bvb | 5.49 | 7.7655 | 6.1028 | -7.63  | -9.68  |
| 1a8i | 5.52 | 3.5389 | 4.4894 | -7.77  | -10.55 |
| 1oe8 | 5.52 | 3.6742 | 3.8493 | -5.41  | -7.13  |
| 1ydr | 5.52 | 4.4115 | 5.1625 | -9.26  | -9.52  |
| 2cht | 5.52 | 3.7169 | 4.855  | -7.8   | -7.16  |
| 1bjv | 5.54 | 4.4735 | 4.5487 | -5.93  | -8.77  |
| 1y3n | 5.55 | 4.3535 | 4.5061 | -6.16  | -11.8  |
| 2iuz | 5.55 | 7.0726 | 4.9896 | -9.29  | -9.55  |
| 1jak | 5.57 | 4.3057 | 5.642  | -8.95  | -10.31 |
| 1njd | 5.57 | 3.8886 | 4.9167 | -6.55  | -7.75  |
| 3bex | 5.57 | 3.4113 | 4.5001 | -3.74  | -5.79  |
| 1f4x | 5.59 | 3.999  | 3.9112 | -6.14  | -8.5   |
| 1mfi | 5.59 | 4.76   | 5.7851 | -4.14  | -2.92  |
| 1vfn | 5.6  | 2.6303 | 5.0027 | -6.14  | -4.64  |
| 1a08 | 5.62 | 5.0818 | 5.0438 | -8.4   | -10.84 |
| 1ejn | 5.62 | 5.9106 | 5.5761 | -5.14  | -4.83  |
| 2bmk | 5.62 | 4.3    | 4.2946 | -5.22  | -3.06  |
| 2ojg | 5.64 | 4.7883 | 5.0461 | -10    | -10.52 |
| 1nhu | 5.66 | 3.6048 | 5.0186 | -5.85  | -6.16  |
| 2pqz | 5.67 | 7.7347 | 6.7827 | -9.18  | -8.87  |
| 1ow4 | 5.68 | 5.0277 | 5.0792 | -8.15  | -9.03  |
| 2cbu | 5.68 | 3.7911 | 5.739  | -7.82  | -9.49  |
| 1g98 | 5.7  | 2.7374 | 4.3913 | -8.17  | -6.48  |
| 1jsv | 5.7  | 4.3373 | 4.9471 | -8.2   | -9.23  |
| 2f2h | 5.7  | 6.4268 | 5.5272 | -8.33  | -11.58 |
| 1n7m | 5.71 | 8.5755 | 5.8118 | -7.49  | -8.22  |
| 2qg0 | 5.72 | 4.983  | 4.8965 | -6.31  | -5.34  |
| 1o33 | 5.74 | 4.2467 | 4.6457 | -9.2   | -9.66  |
| 1o5e | 5.74 | 6.2024 | 5.6436 | -10.72 | -10.8  |
| 1qy2 | 5.74 | 2.5931 | 3.5967 | -6.44  | -5.47  |
| 2b1v | 5.74 | 3.2311 | 4.4951 | -9.45  | -9.09  |
| 2pgz | 5.74 | 5.1342 | 5.0118 | -10.99 | -13.36 |
| 1p1o | 5.76 | 3.8775 | 4.9342 | -10.12 | -11.64 |
| 1o5b | 5.77 | 3.473  | 6.8263 | -9.04  | -8.06  |

|      |      |        |        |        |        |
|------|------|--------|--------|--------|--------|
| 1q66 | 5.77 | 6.3911 | 6.1982 | -8.81  | -8.42  |
| 1hmt | 5.79 | 3.7702 | 3.9812 | -1.4   | -4.86  |
| 1kpm | 5.8  | 6.5194 | 5.6171 | -5.19  | -6.75  |
| 2q88 | 5.8  | 4.1368 | 6.0205 | -9.47  | -10.76 |
| 1urg | 5.82 | 4.0568 | 3.7509 | -6.98  | -10.46 |
| 3gss | 5.82 | 7.6125 | 5.0154 | -8.09  | -8.83  |
| 1k4g | 5.85 | 4.713  | 4.6239 | -10.21 | -10.24 |
| 1o2w | 5.85 | 5.1379 | 4.142  | -9.88  | -9.73  |
| 1o2x | 5.85 | 5.214  | 4.2974 | -9.48  | -9.64  |
| 1ogz | 5.85 | 3.2376 | 4.476  | -6.92  | -7.46  |
| 1q63 | 5.85 | 5.1148 | 5.3377 | -9.39  | -9.4   |
| 1u1w | 5.85 | 3.8606 | 5.469  | -7.07  | -5.69  |
| 2r3t | 5.85 | 9.7872 | 7.1036 | -12.44 | -12.16 |
| 3e5u | 5.85 | 3.3395 | 4.9651 | -10.5  | -10.58 |
| 1e1x | 5.89 | 3.7685 | 4.1421 | -5.55  | -8.61  |
| 1ydk | 5.89 | 5.1376 | 4.6723 | -5.87  | -8.56  |
| 2brm | 5.89 | 4.5344 | 4.6435 | -5.59  | -5.81  |
| 1v2n | 5.9  | 5.3435 | 5.6868 | -9.79  | -9.57  |
| 1ugx | 5.91 | 3.0559 | 3.356  | -6     | -9.05  |
| 1a4w | 5.92 | 6.9672 | 6.2565 | -8.36  | -11.7  |
| 1kyv | 5.92 | 6.7477 | 5.1727 | -10.52 | -12.61 |
| 1pph | 5.92 | 5.0626 | 5.3386 | -8.98  | -9.47  |
| 1yds | 5.92 | 4.3972 | 5.0237 | -9.73  | -12.16 |
| 1fv0 | 5.93 | 5.0933 | 4.3642 | -7.1   | -3.16  |
| 1b9j | 5.96 | 7.6125 | 5.3946 | -10.51 | -11.88 |
| 1nl9 | 5.96 | 6.2375 | 5.0672 | -8.16  | -8.67  |
| 1o36 | 5.96 | 6.7373 | 5.089  | -9.64  | -10.46 |
| 1c5s | 6    | 3.3322 | 5.2842 | -8.45  | -7.64  |
| 1ceb | 6    | 2.5461 | 4.7332 | -6.68  | -8.23  |
| 1hn2 | 6    | 3.8831 | 3.9206 | -9.07  | -9.47  |
| 1ssq | 6    | 1.6734 | 4.7276 | -5.92  | -6.15  |
| 1xgj | 6    | 3.6809 | 4.4833 | -5.41  | -6.15  |
| 2bvd | 6    | 4.2255 | 5.0355 | -6.2   | -8.39  |
| 2izl | 6    | 4.169  | 5.1382 | -7.42  | -9.57  |
| 2r43 | 6    | 8.1134 | 6.6149 | -10.76 | -10.71 |
| 1eb2 | 6.01 | 7.5101 | 6.0227 | -8.96  | -8.62  |
| 1tcw | 6.02 | 5.9571 | 5.306  | -6.73  | -7.24  |
| 5er1 | 6.02 | 5.9137 | 4.9127 | -8.25  | -7.77  |
| 1n8v | 6.03 | 2.585  | 3.5299 | -3.02  | -6.05  |
| 3bgb | 6.05 | 6.8564 | 5.7051 | -8.56  | -7.38  |
| 1jmg | 6.07 | 4.0192 | 5.216  | -7.06  | -5.25  |



|      |      |        |        |        |        |
|------|------|--------|--------|--------|--------|
| 2gst | 6.07 | 7.255  | 5.8245 | -10.05 | -12.97 |
| 1dzk | 6.1  | 2.0499 | 3.2115 | -6.22  | -5.62  |
| 1m2q | 6.1  | 4.4387 | 4.825  | -8.6   | -8.73  |
| 2e7f | 6.1  | 5.6366 | 4.9113 | -5.88  | -5.75  |
| 2flr | 6.1  | 7.8232 | 5.8767 | -7.79  | -7.22  |
| 2p7a | 6.1  | 2.4539 | 4.4441 | -7.09  | -6.35  |
| 2wed | 6.1  | 6.5028 | 5.6187 | -9.42  | -7.67  |
| 1g32 | 6.11 | 7.7134 | 5.7176 | -8.57  | -8.96  |
| 1o2z | 6.11 | 6.3572 | 4.8454 | -9.02  | -10.32 |
| 2qmq | 6.11 | 8.0547 | 7.1362 | -10.28 | -8.9   |
| 1nc1 | 6.12 | 7.0555 | 5.8074 | -11.83 | -12.49 |
| 2fgv | 6.12 | 9.6324 | 6.8101 | -7.13  | -8.37  |
| 1ppc | 6.16 | 6.3419 | 5.7613 | -8.89  | -10.87 |
| 2i4j | 6.16 | 7.4882 | 5.6922 | -8.08  | -9.74  |
| 1d6v | 6.17 | 5.9801 | 5.0852 | -9.53  | -13.1  |
| 1ycl | 6.17 | 4.8142 | 4.9157 | -8.52  | -8.77  |
| 1xhy | 6.18 | 4.5297 | 5.3768 | -9.26  | -10.53 |
| 2qhm | 6.18 | 4.1472 | 4.9191 | -8.76  | -8.54  |
| 1v2k | 6.19 | 8.1203 | 6.2299 | -9.17  | -7.86  |
| 2bt9 | 6.19 | 2.7682 | 4.3992 | -6.71  | -8.08  |
| 2qbu | 6.19 | 7.4919 | 5.7964 | -11.39 | -15.57 |
| 1owe | 6.2  | 4.3292 | 4.8891 | -9.19  | -8.41  |
| 2aj8 | 6.2  | 5.7871 | 5.0164 | -8.58  | -10    |
| 1wcq | 6.26 | 3.9979 | 4.2963 | -7.4   | -10.5  |
| 2ok1 | 6.26 | 5.954  | 5.4619 | -8.68  | -7.05  |
| 3bgz | 6.26 | 4.8587 | 4.8054 | -7.96  | -8.07  |
| 1pbq | 6.27 | 4.078  | 4.7463 | -8.35  | -8.99  |
| 3bfu | 6.27 | 3.5509 | 5.2316 | -8.97  | -10.35 |
| 1lag | 6.3  | 3.865  | 5.861  | -9.28  | -11.57 |
| 1wdn | 6.3  | 3.5949 | 5.3743 | -8.72  | -8.46  |
| 1wm1 | 6.3  | 4.344  | 5.381  | -7.79  | -7.75  |
| 2q89 | 6.3  | 4.1263 | 5.5734 | -9.67  | -11.3  |
| 3ebl | 6.3  | 4.4254 | 5.6038 | -9.29  | -9.59  |
| 2bal | 6.31 | 5.0285 | 4.8527 | -9.37  | -9.74  |
| 1w3j | 6.32 | 2.7937 | 5.2251 | -6.54  | -7.89  |
| 2qbr | 6.33 | 5.4582 | 5.0918 | -8.1   | -7.27  |
| 3cj5 | 6.34 | 4.5055 | 4.8591 | -5.95  | -4.72  |
| 3ckp | 6.35 | 8.0702 | 5.7918 | -10.73 | -11.32 |
| 1c5q | 6.36 | 3.3495 | 6.3726 | -8.22  | -8.14  |
| 1ela | 6.36 | 6.3088 | 5.4513 | -4.59  | -6.45  |
| 1o2o | 6.36 | 5.6614 | 5.2847 | -9.03  | -8.78  |

|      |      |        |        |        |        |
|------|------|--------|--------|--------|--------|
| 1hbv | 6.37 | 7.5044 | 5.7774 | -6.68  | -6.08  |
| 1hms | 6.37 | 3.5581 | 3.6362 | -2.21  | -5     |
| 1i7z | 6.4  | 5.0728 | 4.9574 | -6.92  | -5.39  |
| 1usk | 6.4  | 3.7202 | 5.4496 | -8.05  | -5.21  |
| 2o2u | 6.4  | 4.952  | 5.5164 | -8.3   | -8.11  |
| 1syh | 6.41 | 5.2336 | 5.852  | -10.38 | -11.18 |
| 2cgf | 6.41 | 3.8357 | 4.216  | -6.75  | -5.53  |
| 1o5a | 6.42 | 5.8148 | 5.4493 | -10.24 | -10.22 |
| 1fh9 | 6.43 | 4.7664 | 5.1353 | -7.36  | -10.94 |
| 2b07 | 6.43 | 6.0967 | 6.2935 | -8.89  | -9.13  |
| 1gt3 | 6.46 | 2.3391 | 3.3745 | -5.11  | -6.09  |
| 1m2r | 6.46 | 4.9688 | 5.0555 | -8.21  | -8.23  |
| 1r5y | 6.46 | 4.4897 | 5.8472 | -9.94  | -8.61  |
| 1f4g | 6.48 | 5.8068 | 4.6615 | -8.12  | -7.17  |
| 1gpn | 6.48 | 5.2058 | 5.8471 | -9.54  | -9.01  |
| 1rpj | 6.48 | 3.0888 | 5.4871 | -6.67  | -11.8  |
| 1dl7 | 6.49 | 4.0213 | 4.1896 | -8.05  | -7.44  |
| 3cj4 | 6.51 | 4.2676 | 4.4338 | -6.38  | -5.76  |
| 1ct8 | 6.52 | 6.8116 | 5.5033 | -10.03 | -10.99 |
| 1g74 | 6.52 | 4.2166 | 5.2252 | -0.64  | -2.98  |
| 1gt4 | 6.52 | 2.8188 | 3.5893 | -0.28  | -5.18  |
| 1qy1 | 6.52 | 3.1491 | 4.4036 | -6.28  | -5.45  |
| 1zhy | 6.52 | 4.5891 | 5.7815 | -10.11 | -11.72 |
| 2nt7 | 6.52 | 7.525  | 6.4497 | -8.09  | -7.62  |
| 2oxy | 6.52 | 2.5611 | 3.5675 | -5.9   | -5.39  |
| 3d0b | 6.54 | 6.6552 | 5.2025 | -10.96 | -11.23 |
| 1dhj | 6.55 | 5.5194 | 3.8509 | -8.66  | -9.68  |
| 1hmr | 6.55 | 3.5621 | 3.9658 | -1.33  | -3.79  |
| 1n4h | 6.55 | 4.2746 | 4.6754 | -8.67  | -11.01 |
| 1yc4 | 6.55 | 4.2911 | 4.8957 | -7.86  | -6.76  |
| 2bok | 6.55 | 6.2133 | 5.487  | -10.97 | -12.09 |
| 2pwc | 6.57 | 8.6919 | 6.7921 | -10.13 | -9.88  |
| 1k1i | 6.58 | 5.4688 | 5.5559 | -10.67 | -11.9  |
| 1izi | 6.59 | 9.6779 | 6.4208 | -7.8   | -5.84  |
| 2pvh | 6.59 | 5.131  | 4.7414 | -7.36  | -8.25  |
| 2pwr | 6.59 | 10.401 | 7.3191 | -13.4  | -12.58 |
| 1g7g | 6.6  | 8.583  | 5.1613 | -8.58  | -10.9  |
| 2j4g | 6.6  | 5.0311 | 5.9178 | -6.51  | -8.9   |
| 1ii5 | 6.62 | 2.8975 | 4.9083 | -8.99  | -9.66  |
| 2zb0 | 6.62 | 6.7669 | 5.5526 | -5.47  | -6.16  |
| 3f8f | 6.63 | 6.4526 | 4.5849 | -8.43  | -11.1  |

|      |      |        |        |        |        |
|------|------|--------|--------|--------|--------|
| 2d3z | 6.64 | 5.2624 | 5.3989 | -7.71  | -6.64  |
| 1o3p | 6.66 | 5.268  | 5.1626 | -11.31 | -10.53 |
| 1pxp | 6.66 | 6.264  | 5.277  | -9.52  | -10.62 |
| 1c5x | 6.68 | 3.8298 | 6.9426 | -9.67  | -8.24  |
| 2fqw | 6.68 | 4.6201 | 5.2953 | -9.64  | -8.9   |
| 2iwx | 6.68 | 3.8636 | 4.3147 | -7.05  | -5.82  |
| 2qbs | 6.68 | 5.3565 | 5.1377 | -8.02  | -7.61  |
| 1b0h | 6.7  | 10.311 | 6.3311 | -12.08 | -15.46 |
| 1dfo | 6.7  | 7.5527 | 5.0634 | -8.77  | -10.42 |
| 1eld | 6.7  | 6.7    | 6.3768 | -5.45  | -4.85  |
| 2oxx | 6.7  | 2.8828 | 4.4655 | -6.12  | -6.41  |
| 3eko | 6.7  | 2.7217 | 4.4287 | -6.61  | -5.82  |
| 3gst | 6.72 | 7.7753 | 5.7551 | -11.82 | -15.48 |
| 1usi | 6.74 | 4.7704 | 5.7499 | -9.16  | -9.91  |
| 1o30 | 6.77 | 6.4856 | 5.2588 | -10.06 | -9.19  |
| 1o3j | 6.77 | 4.9005 | 4.9001 | -9.33  | -9.23  |
| 1o3k | 6.77 | 4.6365 | 4.5806 | -9.12  | -9.01  |
| 1ony | 6.77 | 6.8495 | 5.3659 | -7.91  | -8.01  |
| 1qb1 | 6.77 | 6.9749 | 5.6204 | -10.3  | -11.26 |
| 2rcb | 6.79 | 2.1363 | 5.7398 | -9.05  | -13.02 |
| 1fl3 | 6.8  | 6.478  | 5.1678 | -10.15 | -11.94 |
| 1nq7 | 6.8  | 4.8082 | 4.6944 | -10.24 | -11.88 |
| 1p1n | 6.8  | 4.213  | 5.0131 | -10.67 | -12.24 |
| 3d94 | 6.8  | 8.0889 | 6.1271 | -12.92 | -12.07 |
| 1drk | 6.82 | 2.681  | 5.6066 | -7.67  | -11.71 |
| 1fhd | 6.82 | 5.1229 | 5.1034 | -6.66  | -9.51  |
| 1k1n | 6.82 | 5.3705 | 5.3492 | -9.07  | -11.23 |
| 1uwf | 6.82 | 2.5485 | 4.3102 | -3.75  | -5.36  |
| 2oxd | 6.82 | 2.9152 | 4.2    | -5.86  | -5.59  |
| 1bhx | 6.84 | 6.649  | 5.7074 | -10.6  | -10.72 |
| 1ele | 6.85 | 6.6525 | 5.7495 | -7.05  | -6.41  |
| 1g30 | 6.85 | 7.3986 | 5.3654 | -8.25  | -9.7   |
| 1os5 | 6.85 | 4.9859 | 5.1812 | -4.77  | -6.48  |
| 1q72 | 6.85 | 4.6047 | 4.8041 | -5.84  | -5.06  |
| 1xk9 | 6.85 | 5.6821 | 5.0302 | -8.2   | -8.25  |
| 1xt8 | 6.85 | 2.304  | 5.7236 | -9.48  | -14.56 |
| 1xka | 6.88 | 7.3442 | 5.345  | -8.65  | -11.29 |
| 1fh8 | 6.89 | 4.1008 | 4.9589 | -8.48  | -12.21 |
| 1sb1 | 6.89 | 7.6344 | 6.6908 | -8.28  | -7.23  |
| 2dri | 6.89 | 2.6249 | 5.7372 | -7.61  | -11.44 |
| 2f34 | 6.89 | 3.6515 | 4.6812 | -6.38  | -9.23  |

|       |      |        |        |        |        |
|-------|------|--------|--------|--------|--------|
| 2r3w  | 6.89 | 8.5329 | 6.8669 | -11.47 | -10.63 |
| 1swr  | 6.92 | 4.5607 | 5.8461 | -10.5  | -11.4  |
| 2d3u  | 6.92 | 4.9809 | 5.173  | -7.72  | -6.71  |
| 2g79  | 6.92 | 3.4841 | 4.7917 | -5.76  | -4.98  |
| 2uy0  | 6.92 | 10.582 | 6.5289 | -12.75 | -15.01 |
| 1tcx  | 6.95 | 7.2206 | 5.6192 | -10.77 | -12.42 |
| 1c5c  | 6.96 | 4.7501 | 5.3628 | -9.36  | -9.41  |
| 1ent  | 6.96 | 7.5441 | 5.7664 | -7.66  | -8.26  |
| 1gvw  | 6.96 | 7.9002 | 5.8947 | -6.87  | -6.81  |
| 1oyq  | 6.96 | 6.7109 | 5.0566 | -10.41 | -10.89 |
| 1x8j  | 6.96 | 2.3154 | 4.6055 | -8.49  | -9.13  |
| 1fki  | 7    | 4.8976 | 4.536  | -7.14  | -7.5   |
| 1fpc  | 7    | 6.4822 | 5.48   | -7.34  | -8.52  |
| 1gj6  | 7    | 6.2275 | 5.8558 | -9.63  | -9.35  |
| 2j7g  | 7    | 4.5805 | 4.93   | -8.08  | -10.92 |
| 3cdb  | 7.02 | 6.8822 | 6.6083 | -9.17  | -8.53  |
| 1b1h  | 7.03 | 8.9082 | 5.849  | -11.77 | -15    |
| 2bq7  | 7.05 | 7.3985 | 5.8359 | -10.26 | -9.7   |
| 1lpg  | 7.09 | 8.588  | 6.3105 | -12.74 | -11.73 |
| 2bz6  | 7.09 | 6.3241 | 5.2931 | -10.07 | -11.5  |
| 2il2  | 7.1  | 10.123 | 6.2642 | -8.83  | -10.59 |
| ##### | 7.11 | 5.083  | 5.0481 | -9.21  | -9.12  |
| 1b05  | 7.12 | 7.208  | 5.6818 | -10.77 | -13.57 |
| 1nz7  | 7.12 | 7.7356 | 5.5446 | -7.6   | -9.57  |
| 1o3d  | 7.13 | 5.5022 | 5.531  | -9.37  | -8.45  |
| 1zog  | 7.15 | 3.4075 | 4.5135 | -6.22  | -6.63  |
| 2fqx  | 7.15 | 4.8711 | 5.3838 | -10.36 | -9.6   |
| 2qnn  | 7.15 | 10.126 | 8.2955 | -14.04 | -12.95 |
| 1f0u  | 7.16 | 7.3149 | 5.3722 | -6.09  | -10.89 |
| 1g36  | 7.17 | 6.4624 | 5.3767 | -9.34  | -10.57 |
| 2q63  | 7.18 | 7.9876 | 6.66   | -9.72  | -10.21 |
| 1fcx  | 7.19 | 7.7418 | 5.907  | -14.2  | -13.28 |
| 2j7h  | 7.19 | 2.5653 | 5.2064 | -6.79  | -8.66  |
| 3c79  | 7.2  | 5.1235 | 4.8524 | -6.5   | -7.86  |
| 1sw2  | 7.22 | 2.9803 | 5.3444 | -9.39  | -9.81  |
| 2epn  | 7.22 | 4.1489 | 5.4871 | -6.92  | -6.04  |
| 1g2l  | 7.24 | 9.2415 | 5.4971 | -11.43 | -12.6  |
| 1oyt  | 7.24 | 5.863  | 5.6245 | -10.91 | -12.1  |
| 2psv  | 7.24 | 7.3879 | 5.7297 | -8.36  | -10.55 |
| 1jet  | 7.25 | 7.1508 | 5.3119 | -11.39 | -11.8  |
| 1dhi  | 7.26 | 5.5957 | 3.8076 | -9.03  | -9.81  |

|      |      |        |        |        |        |
|------|------|--------|--------|--------|--------|
| 1mrx | 7.26 | 8.5156 | 6.1386 | -9.83  | -11.73 |
| 1b40 | 7.28 | 8.8594 | 5.8463 | -12.59 | -14.97 |
| 1kel | 7.28 | 4.9931 | 4.5523 | -8.37  | -3.66  |
| 2pql | 7.28 | 4.0029 | 5.7451 | -9.62  | -9.69  |
| 2qhz | 7.28 | 8.0748 | 7.474  | -11.71 | -10.69 |
| 3ccz | 7.29 | 5.9571 | 5.4061 | -6.93  | -7.39  |
| 1o3i | 7.3  | 4.5933 | 4.9723 | -9.34  | -9.81  |
| 2qi1 | 7.3  | 8.5764 | 6.5704 | -10.51 | -11.04 |
| 1ydt | 7.32 | 6.5494 | 5.6083 | -10.3  | -11.35 |
| 2j7e | 7.32 | 5.0617 | 5.1341 | -8.27  | -11.14 |
| 2j2u | 7.33 | 7.8885 | 5.7066 | -8.15  | -7.67  |
| 2r2m | 7.33 | 6.6687 | 5.5559 | -6.71  | -8.96  |
| 1uw6 | 7.34 | 4.2028 | 5.0051 | -10.26 | -9.77  |
| 2gv6 | 7.34 | 4.9646 | 5.6155 | -10.06 | -10.6  |
| 1swg | 7.36 | 3.7419 | 5.1461 | -7.87  | -8.87  |
| 1bxq | 7.38 | 8.2667 | 5.7159 | -9.12  | -8.77  |
| 2qi0 | 7.38 | 9.0885 | 7.0267 | -11.41 | -10.72 |
| 1k1m | 7.4  | 6.2093 | 5.8475 | -10.11 | -10.51 |
| 1oar | 7.4  | 5.9923 | 5.4548 | -7.93  | -9.5   |
| 1owh | 7.4  | 4.66   | 4.9295 | -9.4   | -8.11  |
| 1r6n | 7.4  | 5.6679 | 5.6575 | -6.44  | -4.63  |
| 2bpy | 7.4  | 7.8581 | 6.2657 | -10.3  | -7     |
| 1q5k | 7.42 | 4.5186 | 4.5579 | -6.53  | -8.15  |
| 1t32 | 7.42 | 8.2221 | 6.7969 | -10.23 | -10.18 |
| 2bak | 7.43 | 9.3867 | 5.7818 | -7.86  | -11.07 |
| 1vzq | 7.44 | 6.4506 | 5.8063 | -12.6  | -12.25 |
| 2qbk | 7.44 | 5.533  | 5.4925 | -8.38  | -8.54  |
| 2r38 | 7.44 | 9.4655 | 7.0849 | -8.4   | -10.79 |
| 1sqo | 7.46 | 5.1662 | 5.0563 | -10.01 | -9.43  |
| 2qhy | 7.48 | 8.2714 | 6.9896 | -10.03 | -8.74  |
| 2hhn | 7.49 | 8.7035 | 6.2939 | -6.46  | -6.71  |
| 1lah | 7.52 | 3.2236 | 5.5473 | -9.45  | -11.34 |
| 1lf2 | 7.52 | 8.0601 | 5.9452 | -10.01 | -9.38  |
| 1lke | 7.52 | 5.6216 | 5.718  | -11.09 | -12.49 |
| 3ekr | 7.52 | 3.6719 | 4.867  | -6.93  | -6     |
| 2flg | 7.54 | 6.2439 | 5.5449 | -7.19  | -6.9   |
| 1k1j | 7.55 | 6.3883 | 5.8742 | -7.9   | -11.34 |
| 1lpk | 7.55 | 7.7619 | 5.8529 | -10.62 | -11.49 |
| 1v0l | 7.55 | 3.6986 | 4.9244 | -7.68  | -11.61 |
| 1vj9 | 7.55 | 7.7085 | 5.6896 | -12.41 | -13.12 |
| 3b50 | 7.55 | 3.7902 | 4.3178 | -8.95  | -14.16 |

|      |      |        |        |        |        |
|------|------|--------|--------|--------|--------|
| 3cct | 7.56 | 6.9011 | 6.0928 | -8.75  | -9.19  |
| 1q95 | 7.57 | 4.0892 | 5.106  | -9.69  | -11.37 |
| 2avs | 7.57 | 9.5432 | 6.6087 | -11.78 | -10    |
| 2pyn | 7.57 | 7.7894 | 6.398  | -10.42 | -10.15 |
| 3cd0 | 7.57 | 6.4787 | 5.8952 | -6.2   | -6.51  |
| 3cda | 7.58 | 7.4506 | 6.5062 | -8.61  | -9.86  |
| 1lpz | 7.6  | 8.4485 | 5.9161 | -12.04 | -11.51 |
| 2psu | 7.62 | 8.0051 | 5.7933 | -8.49  | -9.48  |
| 2pvl | 7.62 | 6.1027 | 4.9991 | -9.24  | -7.63  |
| 3be9 | 7.62 | 5.9733 | 5.0621 | -11.31 | -11.33 |
| 1f0r | 7.66 | 7.382  | 5.8006 | -9.21  | -8.76  |
| 1nny | 7.66 | 8.9095 | 6.0687 | -10.11 | -8.03  |
| 1ppk | 7.66 | 6.4718 | 5.3244 | -8.27  | -9.13  |
| 2bpv | 7.67 | 7.4451 | 6.0971 | -10.76 | -10.76 |
| 1o2q | 7.68 | 6.2684 | 5.7822 | -6.2   | -9.76  |
| 1t4v | 7.68 | 5.634  | 4.9582 | -8.72  | -9.72  |
| 1w0z | 7.68 | 6.4544 | 4.9102 | -10.93 | -12.39 |
| 3f8c | 7.68 | 6.9206 | 5.5297 | -7.53  | -9.05  |
| 1izh | 7.7  | 11.299 | 6.7563 | -8.01  | -7.29  |
| 1mes | 7.7  | 8.1767 | 6.1974 | -12.04 | -14.47 |
| 1oau | 7.7  | 4.5432 | 4.2886 | -7.16  | -6.86  |
| 1uou | 7.7  | 4.2057 | 5.0943 | -9.31  | -9.17  |
| 1vja | 7.7  | 7.5568 | 5.3854 | -9.23  | -13.24 |
| 1ajv | 7.72 | 9.2868 | 6.6809 | -10.36 | -11.21 |
| 1j4r | 7.72 | 7.4651 | 5.9758 | -8.25  | -8.97  |
| 1lee | 7.74 | 8.3463 | 5.9912 | -7.92  | -12.44 |
| 1nfu | 7.74 | 6.9148 | 6.2017 | -10.69 | -10.96 |
| 1qbo | 7.74 | 6.12   | 5.3932 | -9.02  | -9.42  |
| 1qiw | 7.74 | 5.8768 | 5.2688 | -7.6   | -8.34  |
| 1rd4 | 7.74 | 6.5757 | 5.6632 | -8.72  | -8.62  |
| 1sbg | 7.74 | 8.1026 | 5.7441 | -10.69 | -11.37 |
| 2jh6 | 7.77 | 6.3475 | 5.8987 | -7.39  | -7.82  |
| 2qm9 | 7.77 | 5.9778 | 5.9238 | -5.97  | -6.12  |
| 3cyw | 7.77 | 8.2908 | 6.0741 | -6.16  | -8.45  |
| 1v48 | 7.8  | 5.5701 | 5.4798 | -9.07  | -7.71  |
| 2ra0 | 7.8  | 9.6247 | 6.1517 | -10.18 | -8.65  |
| 1b6h | 7.82 | 7.5559 | 5.3976 | -9.98  | -13.42 |
| 1nf8 | 7.82 | 4.5818 | 5.0218 | -9.92  | -12.41 |
| 1njs | 7.82 | 7.8275 | 5.4613 | -14.6  | -18.84 |
| 1nvs | 7.82 | 5.893  | 5.8481 | -9.49  | -9.67  |
| 2j34 | 7.82 | 6.9504 | 5.9429 | -8.29  | -7.73  |

|       |      |        |        |        |        |
|-------|------|--------|--------|--------|--------|
| 3cd7  | 7.84 | 7.3393 | 6.3083 | -8.7   | -9.5   |
| 1laf  | 7.85 | 4.0616 | 5.5086 | -9.45  | -11.7  |
| 1lst  | 7.85 | 3.5688 | 5.6646 | -9.43  | -11.69 |
| 2gv7  | 7.85 | 6.7609 | 6.8304 | -6.7   | -10.72 |
| 3ccw  | 7.87 | 5.8546 | 5.5263 | -6.84  | -6.97  |
| 3cd5  | 7.9  | 7.0244 | 5.7584 | -10.64 | -10.85 |
| 1ajx  | 7.91 | 8.0018 | 6.114  | -10.91 | -13.05 |
| 3d7z  | 7.92 | 7.4981 | 5.7184 | -11.48 | -12.21 |
| 1epo  | 7.96 | 9.2981 | 6.6533 | -5.59  | -7.62  |
| 1g2k  | 7.96 | 9.2726 | 6.587  | -12.91 | -13.22 |
| 1hvh  | 7.96 | 6.9132 | 5.9207 | -8.96  | -13.38 |
| 2qe4  | 7.96 | 4.6377 | 4.9946 | -9.7   | -10.06 |
| 3bgq  | 7.96 | 4.3105 | 5.2627 | -7.61  | -5.8   |
| ##### | 8    | 7.2362 | 4.2191 | -10.13 | -10.52 |
| 1a4k  | 8    | 5.41   | 5.4815 | -8.79  | -9.59  |
| 1apw  | 8    | 7.1043 | 5.0342 | -10.11 | -10.44 |
| 1fkg  | 8    | 4.9197 | 4.678  | -8.32  | -9.28  |
| 1gaf  | 8    | 4.6583 | 6.006  | -8.8   | -8.11  |
| 1r0p  | 8    | 7.4029 | 5.4674 | -12.24 | -12.98 |
| 1vyg  | 8    | 5.5565 | 5.3168 | -5.32  | -6.73  |
| 2vnt  | 8    | 6.0012 | 6.7139 | -9.92  | -11.44 |
| 3cyx  | 8    | 9.2302 | 5.7825 | -9.94  | -10.25 |
| 1b7h  | 8.02 | 7.7682 | 5.4098 | -10.57 | -13.13 |
| 1vyf  | 8.05 | 3.5027 | 4.3239 | -1.88  | -3.07  |
| 2bqv  | 8.05 | 8.1571 | 5.9662 | -10.56 | -14.02 |
| 1gni  | 8.07 | 4.8653 | 4.1056 | -3.85  | -10.06 |
| 2rkg  | 8.09 | 8.4171 | 6.203  | -6.77  | -6.25  |
| 1erb  | 8.1  | 5.2499 | 5.0361 | -8.29  | -9.83  |
| 1stc  | 8.1  | 7.5546 | 6.363  | -12.99 | -12.51 |
| 2pvj  | 8.1  | 6.5134 | 5.1206 | -9.41  | -9.9   |
| 1nvr  | 8.11 | 7.0232 | 6.0623 | -11.29 | -11.52 |
| 1g35  | 8.14 | 9.2306 | 6.4886 | -13.3  | -14.43 |
| 1yqj  | 8.14 | 8.0653 | 6.0161 | -11    | -10.87 |
| 1fkh  | 8.15 | 5.1133 | 5.3935 | -7.48  | -8.42  |
| 1w5v  | 8.15 | 11.991 | 7.4945 | -12.55 | -13.82 |
| 2fxu  | 8.15 | 7.7681 | 6.4011 | -9.79  | -11.48 |
| 3bu1  | 8.15 | 2.0095 | 4.5722 | -7.47  | -6.79  |
| 2f80  | 8.18 | 7.902  | 6.2148 | -9.78  | -10.71 |
| 2jds  | 8.2  | 6.589  | 5.3907 | -11.82 | -12.93 |
| 1efy  | 8.22 | 5.4246 | 4.6817 | -8.5   | -8     |
| 1h1s  | 8.22 | 6.4473 | 5.2445 | -10.41 | -12.74 |

|      |      |        |        |        |        |
|------|------|--------|--------|--------|--------|
| 1w11 | 8.22 | 7.2747 | 5.827  | -11.62 | -13.21 |
| 2cji | 8.22 | 7.2689 | 5.5505 | -8.66  | -7.9   |
| 2zcs | 8.22 | 4.6271 | 5.5811 | -8.22  | -6.5   |
| 3d1y | 8.22 | 9.6403 | 6.7421 | -13.34 | -13.17 |
| 3e5a | 8.23 | 6.619  | 5.5207 | -6     | -7.02  |
| 1nvq | 8.25 | 7.679  | 6.2261 | -11.75 | -13.47 |
| 2e2r | 8.26 | 4.7805 | 4.8246 | -10.15 | -10.46 |
| 1tom | 8.3  | 5.9139 | 5.4995 | -10.46 | -10.56 |
| 2cen | 8.3  | 10.202 | 6.6111 | -12.01 | -14.79 |
| 2v95 | 8.3  | 4.8671 | 5.3164 | -8.09  | -10.17 |
| 3d20 | 8.3  | 8.2904 | 6.2824 | -7.69  | -11.32 |
| 2hs2 | 8.31 | 7.6572 | 6.0941 | -5.55  | -12.39 |
| 1hwr | 8.33 | 5.5722 | 5.3826 | -8.49  | -10.96 |
| 2qci | 8.34 | 8.3958 | 6.2268 | -10.42 | -12.22 |
| 1h23 | 8.35 | 8.5015 | 6.2125 | -9.84  | -14.33 |
| 1mj7 | 8.35 | 7.2348 | 5.1713 | -8.84  | -9.75  |
| 1d4j | 8.36 | 10.501 | 6.7429 | -14.68 | -16.47 |
| 3d83 | 8.36 | 7.4873 | 5.8894 | -7.91  | -11.95 |
| 2nmy | 8.37 | 8.0759 | 6.444  | -7.37  | -12.61 |
| 2nmz | 8.37 | 8.8074 | 6.7158 | -8.71  | -11.2  |
| 2nnk | 8.37 | 9.0333 | 6.693  | -8.66  | -12.79 |
| 2nnp | 8.37 | 9.1312 | 6.7055 | -10.06 | -10.5  |
| 1k21 | 8.38 | 6.2346 | 5.2216 | -9.6   | -10.96 |
| 1mu6 | 8.38 | 6.9052 | 5.2281 | -9.42  | -8.51  |
| 1fd0 | 8.4  | 8.2435 | 6.0347 | -14.41 | -17.06 |
| 1k22 | 8.4  | 7.0418 | 5.5673 | -11.41 | -11.5  |
| 1mtr | 8.4  | 8.1323 | 5.5062 | -11.76 | -11.97 |
| 1w5x | 8.4  | 12.608 | 7.9031 | -11.1  | -17.31 |
| 3b68 | 8.4  | 8.2214 | 6.055  | -10.85 | -10.75 |
| 1w96 | 8.41 | 6.5539 | 4.8207 | -8.73  | -9.4   |
| 2oag | 8.47 | 7.1537 | 6.335  | -8.63  | -3.92  |
| 1w5y | 8.48 | 10.981 | 7.7536 | -12.7  | -17.31 |
| 2hs1 | 8.48 | 7.9355 | 5.9407 | -5.86  | -6.26  |
| 2r5p | 8.48 | 9.7456 | 6.5797 | -13.76 | -10.48 |
| 2uxz | 8.48 | 10.049 | 6.1645 | -12.42 | -13.1  |
| 1ec0 | 8.49 | 11.87  | 7.3131 | -10.73 | -17.5  |
| 2ieo | 8.49 | 7.5572 | 5.9707 | -9.41  | -12.34 |
| 2ihq | 8.49 | 6.281  | 5.965  | -10.09 | -8.61  |
| 1fcy | 8.52 | 8.012  | 6.001  | -14.51 | -13.45 |
| 1i5r | 8.52 | 12.612 | 7.1517 | -8.55  | -15    |
| 1ta2 | 8.52 | 7.7881 | 5.887  | -10.12 | -9.54  |



|       |      |        |        |        |        |
|-------|------|--------|--------|--------|--------|
| 1xkk  | 8.52 | 9.3159 | 6.3512 | -6.96  | -8     |
| 2boh  | 8.52 | 8.4247 | 6.7018 | -8.7   | -9.4   |
| 2bxt  | 8.52 | 8.8101 | 6.278  |        |        |
| 2qu6  | 8.52 | 8.3573 | 5.5446 | -13.42 | -15.28 |
| 2vw5  | 8.52 | 5.2363 | 4.7805 | -7.41  | -7.64  |
| 1hos  | 8.55 | 8.1434 | 6.7648 | -13.02 | -11.61 |
| 1ppl  | 8.55 | 7.8562 | 5.7114 | -5     | -4.23  |
| 2byr  | 8.55 | 8.0888 | 6.2352 | -8.99  | -11.01 |
| 1bwa  | 8.6  | 11.205 | 8.1221 | -16.76 | -17.84 |
| 3b66  | 8.6  | 8.0442 | 5.7904 | -11.5  | -11.81 |
| 6std  | 8.64 | 4.3231 | 5.1926 | -8.62  | -9.27  |
| 3d1x  | 8.66 | 9.1823 | 6.7626 | -13.02 | -12.01 |
| 2qd6  | 8.68 | 7.9032 | 6.1042 | -11.72 | -10.44 |
| 2q55  | 8.69 | 9.304  | 6.5215 | -7.8   | -12.52 |
| 1jgl  | 8.7  | 5.346  | 5.7518 | -12.97 | -11.83 |
| 1lnm  | 8.7  | 5.755  | 5.6509 | -9.38  | -10.89 |
| 1ohr  | 8.7  | 7.6183 | 6.4961 | -9.53  | -11.03 |
| 1t7j  | 8.7  | 6.8621 | 5.3835 | -9.54  | -9.2   |
| 1w13  | 8.7  | 6.9904 | 5.3986 | -12.02 | -13.09 |
| 1xap  | 8.7  | 6.8717 | 5.5526 | -12.92 | -14.21 |
| 2f8g  | 8.7  | 7.8891 | 6.1767 | -10.84 | -12.95 |
| 2fr3  | 8.7  | 4.041  | 5.0332 | -6.54  | -6.74  |
| 2jh0  | 8.7  | 6.5278 | 6.1586 | -8.23  | -7.41  |
| 2ojj  | 8.7  | 5.8406 | 5.6648 | -11.7  | -12.53 |
| 2pcp  | 8.7  | 6.3489 | 6.1324 | -9.42  | -9.76  |
| 2uwo  | 8.7  | 7.6464 | 6.1971 | -8.37  | -7.37  |
| 3brn  | 8.7  | 3.4623 | 4.4311 | -9.05  | -7.06  |
| 3eqr  | 8.7  | 8.3973 | 5.6078 | -9.3   | -11.61 |
| 1b6k  | 8.74 | 8.7432 | 5.816  | -12.77 | -13.11 |
| 1mjj  | 8.74 | 7.0674 | 5.1151 | -8.76  | -10.37 |
| 1sdv  | 8.74 | 9.5499 | 6.5036 | -13.33 | -14.2  |
| 2vkm  | 8.74 | 13.284 | 7.1546 | -9.55  | -4.7   |
| 1d4l  | 8.77 | 8.1856 | 5.7948 | -12.01 | -14.81 |
| 1zp8  | 8.77 | 8.9601 | 6.3201 | -7.59  | -6.07  |
| 3b5r  | 8.77 | 7.3911 | 6.0245 | -11.53 | -12.12 |
| 1w5w  | 8.8  | 11.863 | 7.7385 | -12.38 | -17.24 |
| 3d1z  | 8.8  | 7.7036 | 6.147  | -11.84 | -12.19 |
| ##### | 8.85 | 8.45   | 6.8287 | -11.87 | -11.11 |
| 1d4i  | 8.85 | 11.071 | 6.509  | -14.23 | -17.55 |
| 2avo  | 8.85 | 9.5101 | 6.4491 | -11.61 | -10.65 |
| 3b67  | 8.85 | 7.6976 | 6.4748 | -10.45 | -10.27 |

|      |      |        |        |        |        |
|------|------|--------|--------|--------|--------|
| 1nfy | 8.89 | 7.0336 | 6.3846 | -9.16  | -7.48  |
| 1nt1 | 8.89 | 7.854  | 5.537  | -11.51 | -10.3  |
| 2idw | 8.89 | 7.4357 | 5.8965 | -7.05  | -9.21  |
| 1ec1 | 8.92 | 10.638 | 7.1112 | -7.44  | -7.95  |
| 1kzn | 8.92 | 6.719  | 5.7038 | -6.38  | -6.43  |
| 1nfw | 8.96 | 7.6258 | 6.3678 | -8.86  | -7.95  |
| 1mq5 | 9    | 9.3752 | 6.685  | -10.66 | -12.73 |
| 1mu8 | 9    | 7.3929 | 5.4207 | -9.54  | -8.62  |
| 2ien | 9    | 8.1125 | 6.1471 | -9.41  | -13.38 |
| 2j4i | 9    | 8.4093 | 5.8723 | -7.29  | -6.43  |
| 2p4y | 9    | 7.3566 | 6.134  | -12.51 | -11.74 |
| 2q54 | 9.01 | 8.8004 | 6.3437 | -9.86  | -11.11 |
| 1ebw | 9.05 | 9.5807 | 6.1388 | -9.84  | -7.73  |
| 1ezq | 9.05 | 10.172 | 6.0691 | -8.44  | -13.04 |
| 1kdk | 9.05 | 4.3565 | 5.6141 | -11.43 | -10.87 |
| 2qd8 | 9.07 | 8.1525 | 6.1046 | -11.91 | -12.14 |
| 2rkf | 9.08 | 8.703  | 6.2703 | -6.89  | -6.58  |
| 1msn | 9.09 | 9.8292 | 6.5964 | -10.56 | -10.73 |
| 1h22 | 9.1  | 7.9734 | 6.0686 | -10.98 | -15.52 |
| 2qd7 | 9.1  | 8.1565 | 6.1727 | -10.42 | -12.66 |
| 1ta6 | 9.13 | 8.0567 | 5.6317 | -10.53 | -10.27 |
| 2qmg | 9.15 | 10.868 | 7.1221 | -13.65 | -16.98 |
| 2fgu | 9.18 | 9.5122 | 6.8505 | -6.52  | -6.15  |
| 1d4k | 9.22 | 9.4814 | 6.4076 | -8.97  | -13.09 |
| 1fcz | 9.22 | 7.8284 | 6.0045 | -13.79 | -12.73 |
| 1hps | 9.22 | 8.9336 | 6.3573 | -9.37  | -9.35  |
| 1hpy | 9.22 | 7.033  | 5.5889 | -9.57  | -9.99  |
| 1z1r | 9.22 | 8.8352 | 5.8725 | -12.7  | -13.43 |
| 1db1 | 9.26 | 5.7885 | 5.9084 | -12.5  | -14.45 |
| 2avv | 9.26 | 9.5564 | 6.6065 | -11.03 | -9.62  |
| 1sdt | 9.27 | 9.802  | 6.5564 | -13.63 | -11.31 |
| 3b65 | 9.27 | 6.8101 | 6.6773 | -10.88 | -11.3  |
| 1xow | 9.28 | 5.0132 | 5.9531 | -11.51 | -10.14 |
| 2ayr | 9.29 | 8.7488 | 6.5818 | -12.79 | -14.1  |
| 1bv7 | 9.3  | 11.842 | 8.2025 | -16.72 | -19.84 |
| 2aqu | 9.32 | 9.6081 | 5.9078 | -7.21  | -6.85  |
| 2r6w | 9.36 | 7.1487 | 6.3733 | -12.1  | -10.65 |
| 2z4b | 9.36 | 5.1731 | 5.7771 | -10.45 | -10.2  |
| 2p95 | 9.37 | 8.4914 | 6.213  | -10.1  | -8.39  |
| 1ebz | 9.4  | 10.105 | 6.2826 | -10.31 | -15.11 |
| 1ksn | 9.4  | 9.5438 | 5.7968 | -10.64 | -12.14 |

|      |       |        |        |        |        |
|------|-------|--------|--------|--------|--------|
| 1met | 9.4   | 8.6806 | 6.3808 | -12.16 | -15.05 |
| 2o4r | 9.4   | 5.874  | 6.0693 | -12.38 | -13.51 |
| 1hsh | 9.42  | 8.7644 | 6.2738 | -11.98 | -8.18  |
| 1qbs | 9.47  | 8.3623 | 6.2397 | -13.18 | -16.45 |
| 2r6y | 9.49  | 6.9147 | 6.07   | -12.54 | -11.83 |
| 1hvr | 9.51  | 9.7345 | 6.9885 | -13.45 | -14.93 |
| 2bys | 9.52  | 8.4206 | 6.0655 | -14.39 | -17.31 |
| 2g94 | 9.52  | 11.37  | 6.1675 | -6.54  | -8.33  |
| 1dmp | 9.55  | 8.8469 | 6.4122 | -12.84 | -13.6  |
| 1df8 | 9.7   | 4.7893 | 5.1913 | -9.73  | -10.27 |
| 1eby | 9.7   | 11.063 | 6.8259 | -15.69 | -17.37 |
| 1mrw | 9.7   | 8.2186 | 6.1821 | -12.11 | -11.84 |
| 2vh6 | 9.7   | 9.0918 | 7.014  | -9.63  | -9.16  |
| 1z6e | 9.72  | 10.27  | 6.4327 | -11.04 | -8.37  |
| 2std | 9.85  | 3.9904 | 4.951  | -8.43  | -9.61  |
| 2drc | 9.89  | 5.8698 | 3.9303 | -8.17  | -8.5   |
| 1hxb | 9.92  | 9.1019 | 6.8337 | -8.31  | -9.21  |
| 1hvl | 9.95  | 9.7635 | 6.4784 | -6.09  | -8.02  |
| 1bv9 | 9.96  | 11.535 | 8.2072 | -16.51 | -18.2  |
| 1bxo | 10    | 8.5768 | 5.6179 | -9.4   | -7.04  |
| 1d4h | 10    | 10.674 | 6.5464 | -13.49 | -14.79 |
| 1sdu | 10.07 | 9.5182 | 6.4795 | -12.55 | -10.56 |
| 1sr7 | 10.1  | 7.1199 | 6.6614 | -12.1  | -13    |
| 2o4j | 10.1  | 6.2573 | 6.1138 | -11.22 | -12.75 |
| 2p16 | 10.1  | 8.8746 | 5.781  | -10.34 | -8.68  |
| 1y6r | 10.11 | 6.3656 | 5.7572 | -12.49 | -14.63 |
| 2qi3 | 10.2  | 6.7077 | 5.7047 | -9.7   | -11.8  |
| 2qi7 | 10.21 | 7.4998 | 5.7979 | -9.3   | -11.62 |
| 1qbu | 10.24 | 7.963  | 6.7479 | -12.44 | -14.54 |
| 1hvs | 10.3  | 9.5074 | 6.355  | -7.55  | -8.22  |
| 1kzk | 10.39 | 9.2897 | 6.7259 | -13.43 | -14.01 |
| 2qi4 | 10.44 | 8.5335 | 6.5665 | -11.04 | -12.85 |
| 2o4k | 10.46 | 10.287 | 6.2445 | -8.08  | -8.79  |
| 1msm | 10.48 | 9.9681 | 6.7223 | -12.5  | -12.76 |
| 5std | 10.49 | 7.05   | 5.4737 | -11.22 | -12    |
| 2o4s | 10.51 | 10.055 | 6.4943 | -8.16  | -7.96  |
| 1n46 | 10.52 | 7.5437 | 5.7128 | -11.08 | -10.92 |
| 2f81 | 10.52 | 8.0104 | 6.1374 | -7.22  | -11.43 |
| 1qbr | 10.57 | 11.178 | 8.179  | -16.12 | -17.33 |
| 2qi6 | 10.57 | 8.5358 | 6.5497 | -11.36 | -11.89 |
| 3djk | 10.59 | 7.6862 | 5.7928 | -11.09 | -11.32 |

|      |       |        |        |        |        |
|------|-------|--------|--------|--------|--------|
| 3cs7 | 10.68 | 8.425  | 6.4818 | -9.57  | -9.28  |
| 2pk5 | 10.7  | 12.885 | 7.8776 | -10.52 | -14.26 |
| 7std | 10.72 | 4.1803 | 5.0554 | -9.32  | -10.4  |
| 1hxw | 10.82 | 9.5279 | 6.9342 | -7.03  | -8.41  |
| 2qi5 | 10.85 | 8.5725 | 6.3559 | -8.19  | -13.33 |
| 2pk6 | 10.89 | 11.749 | 7.7518 | -16.19 | -16.52 |
| 1hvi | 10.92 | 10.224 | 6.4833 | -9.54  | -8.52  |
| 1hvk | 10.96 | 10.972 | 6.6657 | -8.05  | -8.49  |
| 1mq6 | 11.15 | 9.5741 | 6.13   | -10.6  | -10.34 |
| 2i4v | 11.2  | 8.3801 | 6.1095 | -6.51  | -6.52  |
| 1hpx | 11.26 | 7.8104 | 6.5794 | -7.56  | -7.61  |
| 2q5k | 11.3  | 9.8163 | 6.4231 | -7.69  | -6.4   |
| 2hb3 | 11.35 | 7.9608 | 6.1581 | -11.08 | -11.46 |
| 1hvj | 11.4  | 10.264 | 6.5103 | -8.54  | -8.89  |
| 2i0a | 11.4  | 8.0905 | 6.0559 | -6.46  | -4.55  |
| 2i4u | 11.57 | 8.0221 | 6.1305 | -7.34  | -10.74 |
| 2i4w | 11.59 | 9.1315 | 6.3321 | -11.17 | -10.36 |
| 2i4d | 11.68 | 8.2556 | 6.0726 | -7.06  | -5.74  |
| 1y6q | 11.7  | 6.103  | 5.3171 | -12.1  | -12.5  |
| 2i4x | 11.72 | 9.7985 | 6.3358 | -11.4  | -11.81 |

**Table 2S.** Heatmap docking RMSD result against a test set with 795 protein-ligand complexes.

| PDB ID | RMSD        |                   |                   | PDB ID | RMSD        |                   |                   |
|--------|-------------|-------------------|-------------------|--------|-------------|-------------------|-------------------|
|        | for Heatmap | RMSD for Glide SP | RMSD for Glide XP |        | for Heatmap | RMSD for Glide SP | RMSD for Glide XP |
| 2aac   | 0.77        | 0.28              | 0.66              | lizi   | 1.46        | 9.08              | 9.08              |
| 1ajp   | 0.57        | 0.8               | 2.76              | 2pvh   | 2.53        | 5.01              | 4.86              |
| luto   | 0.37        | 1.27              | 2.28              | 2pwr   | 1           | 0.43              | 0.55              |
| 1qi0   | 0.1         | 4.52              | 4.52              | 1g7g   | 3.43        | 6.2               | 0.00              |
| 6rnt   | 0.82        | 10.13             | 5.68              | 2j4g   | 2.72        | 0.25              | 0.28              |
| 1oba   | 1.94        | 3.31              | 2.85              | 1ii5   | 4.65        | 0.71              | 1.44              |
| 2i2b   | 2.46        | 0.55              | 0.38              | 2zb0   | 0.25        | 0.71              | 0.67              |
| 1tok   | 1.06        | 0.35              | 0.31              | 3f8f   | 0.31        | 6                 | 1.72              |
| 1utl   | 0.17        | 0.71              | 2.68              | 2d3z   | 2.39        | 0.74              | 1.09              |
| 1gyx   | 1.16        | 1.99              | 1.90              | 1o3p   | 2.41        | 1.1               | 1.61              |
| 1ai4   | 1.04        | 0.74              | 1.12              | 1pxp   | 0.69        | 0.51              | 0.41              |
| 2r5a   | 1.16        | 1.23              | 1.72              | 1c5x   | 3.5         | 0.38              | 0.94              |
| 1ajn   | 1.16        | 1.36              | 0.48              | 2fqw   | 3.57        | 0.27              | 0.32              |

|      |      |      |      |      |      |       |      |
|------|------|------|------|------|------|-------|------|
| 3bra | 2.63 | 1.61 | 3.91 | 2iwx | 2.49 | 0.17  | 0.19 |
| 2vyt | 1.65 | 1.61 | 1.57 | 2qbs | 2.29 | 0.87  | 0.90 |
| 2bet | 0.72 | 1.38 | 1.40 | 1b0h | 0.25 | 0.57  | 0.75 |
| 2bza | 0.29 | 0.33 | 0.26 | 1dfo | 1.48 | 0.75  | 0.98 |
| 3c2u | 1.99 | 2.05 | 0.99 | 1eld | 0.04 | 4.77  | 2.31 |
| 2fw6 | 1.63 | 1.14 | 2.07 | 2oxx | 3.65 | 0.78  | 3.97 |
| 2fwp | 1.53 | 2.13 | 1.81 | 3eko | 3.68 | 0.57  | 0.57 |
| 1tng | 0.47 | 0.28 | 0.29 | 3gst | 1.83 | 0.69  | 0.51 |
| 1f4e | 0.54 | 1.49 | 1.08 | 1usi | 3.41 | 0.4   | 0.95 |
| 1ws4 | 0.61 | 0.24 | 0.30 | 1o30 | 0.49 | 3.89  | 4.46 |
| 2v3u | 0.95 | 0.24 | 0.80 | 1o3j | 3.24 | 1.73  | 1.97 |
| 1utm | 1.73 | 0.24 | 1.60 | 1o3k | 3.7  | 1.7   | 0.79 |
| 1ogd | 1.53 | 0.24 | 1.98 | 1ony | 0.14 | 3.55  | 3.71 |
| 1ws5 | 0.83 | 0.31 | 0.36 | 1qbl | 0.35 | 2.67  | 4.53 |
| 2ha3 | 1.92 | 2.88 | 2.38 | 2rcb | 3.66 | 0.18  | 0.34 |
| 1uj6 | 0.45 | 1.04 | 1.92 | 1fl3 | 0.56 | 1.01  | 0.97 |
| 1ylz | 0.41 | 0.2  | 1.10 | 1nq7 | 3.45 | 0.65  | 0.94 |
| 1ugw | 1.42 | 0.23 | 0.33 | 1p1n | 4.48 | 0.94  | 1.52 |
| 3buf | 3.07 | 2.77 | 4.70 | 3d94 | 2.23 | 1.19  | 1.34 |
| 3c2r | 0.05 | 1.88 | 1.19 | 1drk | 3.17 | 0.29  | 0.33 |
| 1lbk | 2.13 | 0.36 | 0.88 | 1fhd | 2.94 | 0.3   | 0.30 |
| 1br6 | 4.12 | 0.81 | 0.76 | 1k1n | 2.51 | 5.17  | 2.01 |
| 1e6s | 0.46 | 0.89 | 3.63 | 1uwf | 2.14 | 5.12  | 3.25 |
| 1tog | 0.47 | 0.89 | 0.72 | 2oxd | 3.45 | 0.93  | 2.45 |
| 2ri9 | 3.52 | 0.89 | 2.30 | 1bhx | 0.33 | 0.65  | 1.23 |
| 1v2j | 0.44 | 0.5  | 1.18 | 1ele | 0.34 | 0.47  | 0.88 |
| 5yas | 2.72 | 1.08 | 2.28 | 1g30 | 0.95 | 3.68  | 2.52 |
| 1bcu | 0.34 | 0.34 | 4.04 | 1os5 | 3.23 | 6.47  | 2.51 |
| 1phw | 3.26 | 5.15 | 3.75 | 1q72 | 3.89 | 0.5   | 0.60 |
| 3c2o | 0.67 | 1.62 | 2.95 | 1xk9 | 2.02 | 5.78  | 2.43 |
| 1tnh | 1.17 | 0.22 | 0.78 | 1xt8 | 2.87 | 0.26  | 1.15 |
| 1v2u | 0.68 | 0.33 | 0.31 | 1xka | 0.8  | 0.82  | 1.68 |
| 1toj | 1.34 | 0.42 | 0.60 | 1fh8 | 4.83 | 0.18  | 0.90 |
| 1uz4 | 0.33 | 0.39 | 0.49 | 1sb1 | 1.29 | 0.3   | 2.75 |
| 2sim | 0.28 | 0.42 | 1.36 | 2dri | 3.76 | 0.27  | 0.29 |
| 1c5o | 1.4  | 1.17 | 1.11 | 2f34 | 2.61 | 1.73  | 1.73 |
| 1utn | 1.47 | 0.29 | 0.83 | 2r3w | 2.85 | 0.25  | 0.22 |
| 1jys | 0.84 | 0.91 | 2.47 | 1swr | 4.09 | 0.37  | 0.49 |
| 1v2r | 1.53 | 2.48 | 3.39 | 2d3u | 3.36 | 0.46  | 1.43 |
| 2cle | 1.66 | 1    | 1.39 | 2g79 | 3.95 | 0.48  | 2.06 |
| 2clf | 1.57 | 1.18 | 1.19 | 2uy0 | 3.11 | 2.69  | 0.94 |
| 1nli | 0.04 | 0.32 | 0.21 | 1tcx | 0.47 | 9.59  | 1.17 |
| 1d7i | 3.56 | 1.02 | 3.39 | 1c5c | 3.83 | 0.29  | 1.09 |
| 3jdw | 3.44 | 1.35 | 4.08 | 1ent | 1.01 | 8.19  | 8.19 |
| 1pb9 | 2.05 | 0.28 | 0.25 | 1gvw | 1.63 | 10.73 | 9.19 |

|      |      |      |      |          |      |      |      |
|------|------|------|------|----------|------|------|------|
| 1gyy | 0.33 | 1.16 | 4.86 | 1oyq     | 0.43 | 1.8  | 3.94 |
| 2azr | 1.47 | 1.03 | 1.26 | 1x8j     | 3.45 | 0.61 | 0.61 |
| 2v00 | 0.1  | 1.5  | 1.50 | 1fki     | 3.64 | 1.15 | 0.16 |
| 3buh | 2.43 | 4.39 | 1.02 | 1fpc     | 0.9  | 5.52 | 1.32 |
| 1c3x | 1.05 | 2.68 | 4.58 | 1gj6     | 1.34 | 0.41 | 0.26 |
| 2a8g | 1.2  | 2.73 | 2.74 | 2j7g     | 3.7  | 0.77 | 1.19 |
| 3clp | 1.87 | 0.25 | 0.31 | 3cdb     | 0.24 | 3.74 | 4.03 |
| 1loq | 0.78 | 0.48 | 0.93 | 1b1h     | 2.25 | 0.77 | 0.71 |
| 1wht | 1.27 | 0.91 | 0.61 | 2bq7     | 0.6  | 0.63 | 0.46 |
| 2bvr | 2.37 | 7.61 | 7.61 | 1lpg     | 2.59 | 1.02 | 2.18 |
| 2fx6 | 0.23 | 0.54 | 0.39 | 2bz6     | 1.33 | 0.63 | 1.56 |
| 2vfk | 0.57 | 7.61 | 7.87 | 2il2     | 5.24 | 6.91 | 0.84 |
| 1ai5 | 0.4  | 1.07 | 0.99 | 3.00E+64 | 3.51 | 0.93 | 2.77 |
| 1nje | 0.73 | 1.09 | 1.09 | 1b05     | 0.15 | 0.9  | 1.14 |
| 2hb1 | 0.81 | 1.1  | 1.16 | 1nz7     | 1.07 | 8.58 | 8.49 |
| 1j16 | 1.97 | 1.08 | 0.56 | 1o3d     | 2.82 | 0.7  | 0.98 |
| 1utj | 2.34 | 0.25 | 0.73 | 1zog     | 3.72 | 1.14 | 3.67 |
| 1n1t | 0.33 | 1.09 | 1.24 | 2fqx     | 3.95 | 0.27 | 0.21 |
| 1aj7 | 0.72 | 1.14 | 1.99 | 2qnn     | 1.15 | 0.56 | 0.66 |
| 1x9d | 0.64 | 0.26 | 0.39 | 1f0u     | 0.27 | 3.94 | 0.72 |
| 2fpz | 0.44 | 0.47 | 2.29 | 1g36     | 1.23 | 1.79 | 1.85 |
| 2wec | 3.07 | 2.43 | 2.43 | 2q63     | 1.4  | 1.51 | 1.51 |
| 2g8r | 2.03 | 6.15 | 6.15 | 1fcx     | 0.96 | 0.33 | 0.26 |
| 1lgw | 2.97 | 0.45 | 0.46 | 2j7h     | 2.42 | 0.33 | 3.69 |
| 1tni | 1.14 | 1.83 | 2.74 | 3c79     | 3.6  | 0.86 | 3.16 |
| 2qrl | 4.3  | 1.14 | 1.95 | 1sw2     | 3.76 | 0.21 | 0.50 |
| 1c5z | 2.15 | 0.4  | 0.36 | 2epn     | 2.32 | 0.36 | 0.22 |
| 1v2w | 0.29 | 1.88 | 4.29 | 1g2l     | 1.44 | 3.15 | 3.15 |
| 3bxh | 1.46 | 0.43 | 0.90 | 1oyt     | 2.39 | 0.66 | 0.66 |
| 1toi | 2.44 | 0.51 | 1.27 | 2psv     | 0.26 | 2.05 | 0.54 |
| 1tuf | 1.68 | 8.46 | 7.60 | 1jet     | 0.17 | 0.65 | 1.24 |
| 2clh | 1.79 | 0.94 | 1.35 | 1dhi     | 2.88 | 0.8  | 1.27 |
| 1n2v | 0.98 | 0.49 | 3.22 | 1mrx     | 2.17 | 3.65 | 0.69 |
| 1c5t | 1.54 | 0.37 | 0.99 | 1b40     | 2.74 | 0.46 | 0.77 |
| 1odj | 1.3  | 0.73 | 0.73 | 1kel     | 3.96 | 1.13 | 1.92 |
| 2bvs | 4.12 | 8.27 | 8.05 | 2pql     | 3.68 | 0.26 | 0.50 |
| 1p19 | 1.41 | 1.33 | 1.23 | 2qhz     | 1.38 | 0.32 | 0.47 |
| 2exm | 1.29 | 0.47 | 0.77 | 3ccz     | 2.31 | 9.12 | 1.09 |
| 1v2q | 0.05 | 2.59 | 4.81 | 1o3i     | 3.56 | 0.63 | 2.12 |
| 1v2s | 2.19 | 1.13 | 1.13 | 2qil     | 1.21 | 0.57 | 0.27 |
| 1c5y | 1.25 | 0.42 | 0.95 | 1ydt     | 1.33 | 0.7  | 0.87 |
| 1c87 | 0.45 | 0.82 | 0.29 | 2j7e     | 2.98 | 0.4  | 0.64 |
| 1ghw | 0.88 | 0.72 | 1.06 | 2j2u     | 0.97 | 0.37 | 0.23 |
| 1odi | 1.57 | 0.76 | 2.25 | 2r2m     | 1.15 | 2.4  | 2.58 |
| 1pzi | 2.41 | 2.39 | 2.41 | 1uw6     | 3.36 | 0.3  | 0.39 |

|      |      |      |      |      |      |       |      |
|------|------|------|------|------|------|-------|------|
| 1ua4 | 0.32 | 0.77 | 1.48 | 2gv6 | 4.11 | 3.38  | 3.61 |
| 2bes | 2.58 | 1.12 | 1.28 | 1swg | 3.27 | 2.53  | 2.46 |
| 1li3 | 3.68 | 0.28 | 0.65 | 1bxq | 1.54 | 4.86  | 4.75 |
| 2qrk | 0.43 | 3.11 | 0.64 | 2qi0 | 0.96 | 0.65  | 1.45 |
| 1e2l | 0.27 | 0.57 | 0.51 | 1k1m | 2.06 | 0.97  | 1.93 |
| 1v2l | 2.54 | 0.34 | 0.23 | 1oar | 2.44 | 0.97  | 1.35 |
| 1det | 2.02 | 3.62 | 5.16 | 1owh | 2.75 | 0.79  | 2.74 |
| 1w3k | 1.01 | 0.25 | 0.26 | 1r6n | 3    | 0.77  | 2.86 |
| 2cli | 0.73 | 0.96 | 1.11 | 2bpy | 0.79 | 11.82 | 1.71 |
| 1ajq | 2.28 | 0.31 | 0.48 | 1q5k | 3.03 | 1.66  | 1.66 |
| 2tpi | 1.11 | 0.9  | 0.73 | 1t32 | 1.39 | 0.42  | 0.64 |
| 2ha6 | 0.16 | 3.46 | 2.17 | 2bak | 3.39 | 9.13  | 3.28 |
| 4rsk | 2.75 | 4.63 | 4.63 | 1vzq | 1.71 | 0.61  | 0.27 |
| 1e3v | 2.79 | 7.75 | 7.75 | 2qbk | 3.3  | 0.57  | 1.05 |
| 1z6s | 1.79 | 3.98 | 3.98 | 2r38 | 3.51 | 3.84  | 0.33 |
| 2ha5 | 4.08 | 4.3  | 2.63 | 1sqo | 2.87 | 0.29  | 0.79 |
| 1ghv | 0.1  | 0.58 | 1.92 | 2qhy | 1.37 | 2.42  | 2.47 |
| 1sv3 | 3.42 | 2    | 2.58 | 2hhn | 2.1  | 10.5  | 2.10 |
| 1bhf | 4.42 | 11.9 | 5.14 | 1lah | 3.25 | 0.24  | 0.21 |
| 2hjb | 1.36 | 1.38 | 1.39 | 1lf2 | 0.94 | 1.09  | 1.09 |
| 1p57 | 0.04 | 1.01 | 1.09 | 1lke | 2.29 | 0.42  | 0.43 |
| 2pwd | 2.72 | 0.27 | 0.45 | 3ekr | 3.46 | 3.11  | 3.27 |
| 1no6 | 0.4  | 1.02 | 0.81 | 2flg | 2.24 | 1.52  | 2.10 |
| 2pu2 | 0.7  | 0.81 | 0.81 | 1klj | 2.01 | 4.49  | 1.95 |
| 2r2w | 1.32 | 0.67 | 0.94 | 1lpk | 0.37 | 2.06  | 0.40 |
| 1qan | 4.44 | 0.49 | 0.36 | 1v0l | 1.28 | 0.3   | 0.34 |
| 2ogy | 0.63 | 0.69 | 3.80 | 1vj9 | 0.27 | 1.66  | 2.81 |
| 1j14 | 2.88 | 1.09 | 1.18 | 3b50 | 3.11 | 0.82  | 0.67 |
| 1gi7 | 0.87 | 1.22 | 1.91 | 3cct | 1.14 | 0.88  | 1.21 |
| 1gu1 | 1.85 | 0.28 | 0.91 | 1q95 | 2.15 | 1.23  | 1.18 |
| 2a4m | 2.67 | 1.49 | 3.14 | 2avs | 3.42 | 0.31  | 0.34 |
| 1fj4 | 0.89 | 0.77 | 0.97 | 2pyn | 0.38 | 0.98  | 8.26 |
| 1l2s | 1.55 | 1.56 | 1.56 | 3cd0 | 1.89 | 1.37  | 0.85 |
| 2jiw | 0.46 | 0.22 | 0.39 | 3cda | 0.22 | 0.79  | 0.37 |
| 1pa9 | 1.49 | 0.34 | 0.89 | 1lpz | 1.47 | 0.72  | 0.62 |
| 1upf | 4.92 | 1.51 | 3.06 | 2psu | 0.67 | 1.97  | 0.60 |
| 2ha2 | 1.11 | 1.51 | 3.21 | 2pvl | 2.63 | 0.56  | 0.40 |
| 2nsl | 0.66 | 1.2  | 1.92 | 3be9 | 2.85 | 0.28  | 0.35 |
| 1c5n | 3.15 | 0.93 | 0.27 | 1f0r | 0.48 | 0.42  | 0.62 |
| 1c86 | 0.06 | 0.36 | 0.20 | 1nny | 2.16 | 1.59  | 1.48 |
| 2j9n | 2.96 | 0.19 | 1.08 | 1ppk | 2.06 | 1.37  | 1.32 |
| 2qfo | 4.5  | 0.49 | 0.57 | 2bpv | 0.39 | 0.6   | 0.95 |
| 3kiv | 3.96 | 0.68 | 1.76 | 1o2q | 2.44 | 8.62  | 1.19 |
| 1v2t | 1.23 | 2.92 | 3.85 | 1t4v | 3.54 | 0.97  | 0.89 |
| 1v2o | 0.83 | 7.08 | 3.11 | 1w0z | 2.12 | 0.45  | 1.04 |

|      |      |      |      |          |      |       |      |
|------|------|------|------|----------|------|-------|------|
| 1ce5 | 2.96 | 1.02 | 0.24 | 3f8c     | 1.32 | 7.09  | 7.09 |
| 1w4p | 3.22 | 4.14 | 4.14 | lizh     | 0.23 | 8.49  | 8.49 |
| 1q8t | 1.45 | 0.89 | 1.41 | 1mes     | 0.83 | 0.36  | 0.46 |
| 2b4l | 3.27 | 0.4  | 0.57 | 1oau     | 5.47 | 1.25  | 1.32 |
| 1oss | 3.83 | 1.02 | 1.83 | 1uou     | 2.05 | 0.49  | 0.44 |
| 2nsj | 0.13 | 1.02 | 1.63 | 1vja     | 0.25 | 5.95  | 0.59 |
| 1bju | 0.43 | 0.26 | 1.03 | 1ajv     | 2.71 | 0.45  | 0.52 |
| 2nta | 0.74 | 0.37 | 0.61 | 1j4r     | 0.44 | 2.81  | 2.65 |
| 1aid | 2.65 | 3.81 | 3.67 | 1lee     | 1.05 | 7.42  | 0.86 |
| 1v1j | 2.31 | 0.3  | 0.68 | 1nfu     | 1.43 | 1.17  | 1.17 |
| 1xff | 1.91 | 0.35 | 1.05 | 1qbo     | 2.81 | 3.09  | 3.56 |
| 2gl0 | 0.4  | 0.7  | 2.12 | 1qiw     | 3.23 | 3.18  | 3.90 |
| 2pwg | 2.65 | 0.5  | 0.30 | 1rd4     | 2.02 | 2.93  | 1.19 |
| 1c83 | 0.97 | 0.31 | 0.77 | 1sbg     | 0.63 | 3.39  | 3.42 |
| 1ecv | 0.43 | 0.19 | 0.86 | 2jh6     | 2.46 | 3.35  | 3.97 |
| 1xgi | 1.09 | 1.09 | 2.74 | 2qm9     | 3.1  | 4.58  | 4.41 |
| 3cj2 | 2.93 | 0.33 | 0.35 | 3cyw     | 0.9  | 10.39 | 7.42 |
| 2brb | 0.1  | 0.65 | 0.65 | 1v48     | 3.86 | 0.91  | 0.58 |
| 1plq | 1.82 | 1.45 | 1.87 | 2ra0     | 3.16 | 0.72  | 0.75 |
| 2j77 | 2.93 | 0.58 | 2.32 | 1b6h     | 0.46 | 0.7   | 0.84 |
| 3cf8 | 1.75 | 6.3  | 2.94 | 1nf8     | 2.61 | 0.92  | 0.83 |
| 1bzc | 2.97 | 1.12 | 0.97 | 1njs     | 0.01 | 0.92  | 1.27 |
| 1e1v | 0.92 | 0.49 | 2.90 | 1nvs     | 3.34 | 0.51  | 0.25 |
| 1h1p | 1.7  | 4.23 | 2.86 | 2j34     | 1.51 | 0.49  | 0.53 |
| 1jqy | 0.11 | 2.65 | 3.07 | 3cd7     | 0.87 | 0.48  | 0.86 |
| 1e2k | 1.1  | 0.58 | 2.31 | 1laf     | 2.56 | 0.9   | 0.90 |
| 2gss | 4.01 | 3.05 | 2.91 | 1lst     | 1.42 | 0.23  | 1.23 |
| 1cea | 4.52 | 1.13 | 1.46 | 2gv7     | 1.89 | 5.39  | 3.13 |
| 1o5g | 2.19 | 0.83 | 1.50 | 3ccw     | 3.49 | 0.85  | 0.75 |
| 1tsy | 1.97 | 2.13 | 2.13 | 3cd5     | 1.52 | 0.57  | 1.38 |
| 3bxg | 2.75 | 0.93 | 0.94 | 1ajx     | 0.16 | 0.33  | 0.44 |
| 1c84 | 0.55 | 0.29 | 0.34 | 3d7z     | 0.73 | 0.45  | 0.40 |
| 1nc3 | 1.75 | 0.49 | 0.75 | 1epo     | 1.32 | 7.97  | 7.97 |
| 2oym | 0.3  | 0.75 | 0.97 | 1g2k     | 0.27 | 0.6   | 0.57 |
| 2glp | 1.18 | 8.23 | 8.23 | 1hvh     | 1.81 | 5.74  | 1.13 |
| 2d0k | 0.73 | 1.03 | 0.99 | 2qe4     | 2.75 | 0.54  | 3.71 |
| 3bge | 2.12 | 2.37 | 0.76 | 3bgq     | 3.32 | 0.31  | 2.45 |
| 2qt5 | 0.37 | 0.93 | 0.92 | 3.00E+92 | 1.32 | 0.5   | 0.38 |
| 2c3l | 1.44 | 0.89 | 1.48 | 1a4k     | 3.49 | 1.66  | 2.04 |
| 1enu | 2.49 | 0.25 | 0.18 | 1apw     | 1.55 | 0.48  | 1.01 |
| 2qtg | 0.06 | 0.45 | 0.57 | 1fkg     | 2.34 | 1.24  | 1.52 |
| 1m48 | 1.14 | 0.84 | 1.20 | 1gaf     | 2.79 | 1.41  | 0.67 |
| 1nw7 | 0.37 | 0.68 | 0.64 | 1r0p     | 1.03 | 0.28  | 0.27 |
| 1od8 | 1.42 | 0.26 | 0.29 | 1vyg     | 2.23 | 1.27  | 3.10 |
| 1onz | 1.47 | 0.83 | 0.81 | 2vnt     | 1.46 | 0.53  | 0.61 |



|      |      |      |      |      |      |       |      |
|------|------|------|------|------|------|-------|------|
| 1v0k | 2.64 | 0.32 | 0.38 | 3cyx | 0.78 | 8.52  | 0.00 |
| 1w7g | 0.73 | 6.61 | 5.90 | 1b7h | 0.44 | 0.69  | 1.03 |
| 1k4h | 0.91 | 0.66 | 0.84 | 1vyf | 3.88 | 2.01  | 3.89 |
| 2web | 1.46 | 5.65 | 5.65 | 2bqv | 0.19 | 2.18  | 2.18 |
| 1gcz | 0.4  | 4.99 | 4.99 | 1gni | 4.03 | 2.08  | 2.75 |
| 2br1 | 0.3  | 0.98 | 1.32 | 2rkg | 0.57 | 8.56  | 8.56 |
| 1pb8 | 2.27 | 0.4  | 1.38 | 1erb | 4.94 | 2.19  | 1.39 |
| 1s38 | 1.38 | 0.25 | 0.30 | 1stc | 0.94 | 0.31  | 0.31 |
| 1thz | 0.04 | 1.02 | 1.02 | 2pvj | 2.75 | 0.65  | 1.67 |
| 2f5t | 0.08 | 0.16 | 0.15 | 1nvr | 1.88 | 0.27  | 0.21 |
| 3b7j | 3.81 | 7.02 | 7.02 | 1g35 | 1.89 | 0.53  | 0.52 |
| 1ocq | 2.22 | 0.15 | 0.24 | 1yqj | 0.13 | 0.26  | 0.33 |
| 1rnt | 2.67 | 0.15 | 0.75 | 1fkh | 1.26 | 1.48  | 1.24 |
| 1j17 | 0.53 | 0.48 | 1.38 | 1w5v | 1.65 | 5.78  | 4.24 |
| 1o5c | 0.35 | 1.58 | 2.01 | 2fxu | 0.66 | 1.28  | 2.40 |
| 1w4o | 3.81 | 7.67 | 7.67 | 3bul | 2.36 | 0.57  | 1.15 |
| 2hxm | 0.4  | 0.96 | 1.29 | 2f80 | 0.48 | 1.35  | 0.51 |
| 1fh7 | 1.71 | 0.27 | 0.40 | 2jds | 2.79 | 0.46  | 1.46 |
| 2jtz | 3.39 | 0.3  | 0.56 | 1efy | 3.31 | 0.91  | 1.98 |
| 1w4q | 2.59 | 1.55 | 1.55 | 1h1s | 2.84 | 0.91  | 0.79 |
| 1b46 | 3.53 | 0.67 | 0.89 | 1w11 | 1.64 | 0.94  | 1.00 |
| 1c88 | 0.58 | 0.77 | 0.82 | 2cji | 1.65 | 0.51  | 0.31 |
| 1a69 | 0.97 | 0.48 | 0.00 | 2zcs | 2.22 | 1.94  | 2.88 |
| 1pr1 | 2.11 | 1.56 | 0.68 | 3d1y | 2.46 | 0.51  | 0.53 |
| 1srg | 2.35 | 6.62 | 6.62 | 3e5a | 2.79 | 6.47  | 2.15 |
| 1vyq | 0.12 | 0.83 | 0.57 | 1nvq | 0.99 | 0.32  | 0.24 |
| 1xbb | 0.16 | 6.02 | 3.82 | 2e2r | 4.37 | 0.15  | 0.17 |
| 2oyk | 2.32 | 0.5  | 0.57 | 1tom | 2.13 | 0.46  | 0.88 |
| 1lvu | 0.07 | 1.92 | 3.03 | 2cen | 3.29 | 0.71  | 0.88 |
| 1y20 | 2.53 | 0.23 | 1.21 | 2v95 | 1.57 | 0.73  | 0.74 |
| 2c80 | 1.43 | 1.49 | 2.07 | 3d20 | 0.02 | 9.7   | 0.65 |
| 1zgi | 0.33 | 7.75 | 0.39 | 2hs2 | 1.13 | 3.58  | 0.65 |
| 2fxv | 0.71 | 0.66 |      | 1hwr | 3.7  | 0.39  | 0.38 |
| 1adl | 2.99 | 4.57 | 3.98 | 2qci | 0.1  | 3.37  | 0.44 |
| 1sgu | 0.87 | 0.52 | 0.94 | 1h23 | 0.26 | 6.42  | 2.09 |
| 1qbv | 2.75 | 0.48 | 0.78 | 1mj7 | 1.93 | 5.53  | 1.80 |
| 2h6b | 3.93 | 0.49 | 0.51 | 1d4j | 1.71 | 1.33  | 1.52 |
| 1bp0 | 3.67 | 0.86 | 0.84 | 3d83 | 1.51 | 11.31 | 0.62 |
| 1r9l | 2.41 | 0.44 | 1.15 | 2nmy | 0.51 | 7.75  | 1.53 |
| 2c1p | 0.16 | 0.3  | 0.34 | 2nmz | 0.76 | 8.44  | 0.00 |
| 2f35 | 3.41 | 1.27 | 1.67 | 2nnk | 1.15 | 7.59  | 0.84 |
| 2i80 | 0.04 | 0.74 | 0.47 | 2nnp | 1.32 | 9.67  | 9.67 |
| 2qg2 | 0.25 | 0.5  | 4.93 | 1k21 | 3.72 | 1     | 0.52 |
| 3b4p | 1.9  | 0.69 | 1.24 | 1mu6 | 2.55 | 0.39  | 0.33 |
| 2j47 | 1.13 | 0.67 | 0.56 | 1fd0 | 0.27 | 0.59  | 0.59 |

|      |      |      |      |      |      |       |      |
|------|------|------|------|------|------|-------|------|
| 1gja | 1.15 | 0.46 | 0.88 | 1k22 | 2.35 | 0.64  | 0.89 |
| 1syi | 0.38 | 0.79 | 0.64 | 1mtr | 0.46 | 0.75  | 0.49 |
| 2iko | 0.02 | 1.03 | 1.03 | 1w5x | 1.65 | 5.9   | 0.82 |
| 1lv8 | 0.43 | 0.94 | 2.97 | 3b68 | 0.31 | 0.76  | 0.57 |
| 1q65 | 1.33 | 1.63 | 1.78 | 1w96 | 3.21 | 0.45  | 0.52 |
| 1gi1 | 1.88 | 0.86 | 0.77 | 2oag | 2.28 | 0.56  | 0.48 |
| 1o2s | 1.75 | 0.92 | 0.65 | 1w5y | 1.18 | 5.73  | 1.51 |
| 1g85 | 4.29 | 2.97 | 4.56 | 2hs1 | 0.94 | 13.97 | 0.43 |
| 1pot | 2.18 | 1.01 | 1.63 | 2r5p | 2.19 | 0.44  | 0.67 |
| 2h4k | 2.26 | 0.77 | 2.09 | 2uxz | 0.66 | 0.84  | 3.86 |
| 2o0u | 3.21 | 0.85 | 2.69 | 1ec0 | 0.85 | 5.81  | 1.07 |
| 3bvb | 3.94 | 6.07 | 6.07 | 2ieo | 1.62 | 1.76  | 0.91 |
| 1a8i | 3.43 | 0.67 | 0.71 | 2ihq | 3.62 | 0.47  | 0.38 |
| 1oe8 | 3.2  | 8.6  | 7.42 | 1fcy | 0.88 | 0.61  | 0.58 |
| 1ydr | 1.92 | 0.69 | 1.12 | 1i5r | 1.09 | 12.91 | 7.33 |
| 2cht | 3.12 | 0.98 | 3.85 | 1ta2 | 1.27 | 0.35  | 0.24 |
| 1bjv | 1.85 | 9.87 | 5.33 | 1xkk | 1.38 | 8.74  | 8.74 |
| 1y3n | 2.07 | 0.8  | 0.00 | 2boh | 0.17 | 1.89  | 0.89 |
| 2iuz | 2.64 | 0.54 | 1.49 | 2bxt | 0.5  |       |      |
| 1jak | 2.19 | 0.17 | 0.23 | 2qu6 | 0.28 | 1.05  | 1.08 |
| 1njd | 2.91 | 4.63 | 1.01 | 2vw5 | 1.69 | 0.36  | 0.35 |
| 3bex | 3.74 | 0.41 | 1.53 | 1hos | 0.7  | 2.07  | 2.39 |
| 1f4x | 2.76 | 0.65 | 0.90 | 1ppl | 1.2  | 6.87  | 6.55 |
| 1mfi | 1.44 | 7.62 | 6.96 | 2byr | 0.8  | 0.31  | 0.93 |
| 1vfn | 2.13 | 1.54 | 4.32 | 1bwa | 0.51 | 0.46  | 0.57 |
| 1a08 | 0.93 | 2.68 | 3.63 | 3b66 | 0.96 | 0.74  | 0.89 |
| 1ejn | 0.5  | 2.68 | 2.04 | 6std | 5.48 | 0.35  | 2.54 |
| 2bmk | 2.29 | 1.24 | 2.25 | 3d1x | 0.9  | 0.39  | 0.36 |
| 2ojg | 1.48 | 0.38 | 0.37 | 2qd6 | 1.35 | 0.52  | 0.74 |
| 1nhu | 3.56 | 4.1  | 5.75 | 2q55 | 1.06 | 2.67  | 0.49 |
| 2pqz | 3.58 | 0.83 | 1.06 | 1jgl | 0.95 | 0.19  | 0.35 |
| 1ow4 | 1.13 | 0.95 | 0.89 | 1lnm | 4.45 | 1.1   | 1.10 |
| 2cbu | 3.27 | 0.35 | 0.35 | 1ohr | 1.87 | 0.63  | 1.34 |
| 1g98 | 3.14 | 2.85 | 2.85 | 1t7j | 3.18 | 0.87  | 1.11 |
| 1jsv | 2.36 | 1.47 | 1.48 | 1w13 | 2.96 | 0.26  | 0.96 |
| 2f2h | 1.26 | 0.62 | 0.79 | 1xap | 3.17 | 0.27  | 0.65 |
| 1n7m | 1.92 | 1.34 | 2.11 | 2f8g | 1.4  | 3.2   | 1.21 |
| 2qg0 | 1.28 | 1.34 | 1.83 | 2fr3 | 2.07 | 0.73  | 1.95 |
| 1o33 | 2.59 | 0.97 | 0.65 | 2jh0 | 3.27 | 1.21  | 4.10 |
| 1o5e | 0.8  | 0.56 | 0.69 | 2ojj | 3.94 | 0.49  | 1.28 |
| 1qy2 | 2.59 | 0.58 | 0.37 | 2pcp | 3.07 | 0.52  | 0.57 |
| 2b1v | 4.35 | 0.48 | 0.37 | 2uwo | 1.82 | 1.79  | 2.22 |
| 2pgz | 1.05 | 0.5  | 4.40 | 3brn | 4.41 | 0.27  | 2.90 |
| 1p1o | 3.26 | 0.35 | 0.60 | 3eqr | 0.52 | 1.89  | 1.16 |
| 1o5b | 3.98 | 0.37 | 0.18 | 1b6k | 0.01 | 0.7   | 1.46 |

|      |      |       |      |          |      |       |      |
|------|------|-------|------|----------|------|-------|------|
| 1q66 | 1.08 | 1.12  | 1.06 | 1mjj     | 0.9  | 4.67  | 4.16 |
| lhmt | 3.5  | 1.45  | 3.67 | 1sdv     | 1.4  | 0.49  | 0.20 |
| 1kpm | 1.25 | 13.89 | 4.39 | 2vkm     | 1.87 | 7.65  | 7.65 |
| 2q88 | 2.88 | 0.24  | 0.21 | 1d4l     | 1.01 | 0.79  | 0.51 |
| 1urg | 3.05 | 0.52  | 0.54 | 1zp8     | 0.33 | 9.35  | 9.35 |
| 3gss | 3.1  | 4.37  | 4.37 | 3b5r     | 2.39 | 0.48  | 0.50 |
| 1k4g | 1.97 | 0.9   | 1.40 | 1w5w     | 1.78 | 1.75  | 0.73 |
| 1o2w | 1.23 | 2.58  | 3.80 | 3d1z     | 1.9  | 0.49  | 0.88 |
| 1o2x | 1.1  | 1.34  | 3.74 | 3.00E+93 | 0.69 | 0.45  | 0.41 |
| 1ogz | 4.52 | 0.62  | 0.55 | 1d4i     | 3.85 | 5.9   | 5.90 |
| 1q63 | 1.27 | 0.96  | 0.79 | 2avo     | 1.14 | 0.46  | 1.06 |
| 1u1w | 3.45 | 0.24  | 0.29 | 3b67     | 2    | 0.35  | 0.69 |
| 2r3t | 3.8  | 0.9   | 1.34 | 1nfy     | 3.22 | 0.72  | 0.50 |
| 3e5u | 4.35 | 0.33  | 0.41 | 1nt1     | 1.79 | 0.42  | 0.29 |
| 1e1x | 3.67 | 2.01  | 0.76 | 2idw     | 2.52 | 5.87  | 1.16 |
| 1ydk | 1.3  | 1.05  | 1.13 | 1ec1     | 2.98 | 12.13 | 1.64 |
| 2brm | 2.35 | 4.83  | 4.83 | 1kzn     | 1.91 | 11.76 | 1.76 |
| 1v2n | 0.96 | 0.44  | 0.39 | 1nfw     | 2.31 | 0.47  | 2.27 |
| lugx | 4.94 | 1.13  | 1.70 | 1mq5     | 0.65 | 1.49  | 2.63 |
| 1a4w | 1.81 | 1.19  | 1.74 | 1mu8     | 2.78 | 0.27  | 0.44 |
| 1kyv | 1.43 | 0.64  | 1.39 | 2ien     | 1.54 | 2.22  | 0.89 |
| 1pph | 1.49 | 0.75  | 4.59 | 2j4i     | 1.02 | 6.98  | 6.98 |
| 1yds | 2.64 | 0.53  | 0.89 | 2p4y     | 2.85 | 0.62  | 0.56 |
| 1fv0 | 1.45 | 0.69  | 0.61 | 2q54     | 0.36 | 6.27  | 6.27 |
| 1b9j | 2.86 | 0.79  | 1.06 | 1ebw     | 0.92 | 5.22  | 5.16 |
| 1n19 | 0.48 | 0.46  | 1.09 | 1ezq     | 1.94 | 6.01  | 0.58 |
| 1o36 | 1.35 | 0.95  | 4.45 | 1kdk     | 4.13 | 0.22  | 0.30 |
| 1c5s | 4.62 | 0.5   | 0.74 | 2qd8     | 1.59 | 0.6   | 0.60 |
| 1ceb | 3.33 | 0.95  | 0.84 | 2rkf     | 0.65 | 9.76  | 9.76 |
| 1hn2 | 3.67 | 0.52  | 2.67 | 1msn     | 1.28 | 7.78  | 7.78 |
| 1ssq | 4.1  | 1.85  | 2.53 | 1h22     | 1.95 | 3.41  | 2.85 |
| 1xgj | 4.02 | 3.64  | 3.64 | 2qd7     | 1.63 | 3.27  | 0.50 |
| 2bvd | 3.07 | 0.19  | 0.28 | 1ta6     | 1.86 | 0.43  | 0.45 |
| 2izl | 3.17 | 0.23  | 1.02 | 2qmg     | 2.98 | 0.31  | 0.75 |
| 2r43 | 3.66 | 0.23  | 0.55 | 2fgu     | 0.58 | 9.3   | 9.30 |
| 1eb2 | 2.6  | 0.38  | 0.58 | 1d4k     | 0.45 | 3.35  | 3.35 |
| 1tcw | 0.11 | 3.87  | 3.63 | 1fcz     | 2.41 | 0.3   | 0.31 |
| 5er1 | 0.18 | 5.99  | 5.99 | 1hps     | 0.5  | 8.5   | 6.50 |
| 1n8v | 3.69 | 1.37  | 1.50 | 1hps     | 3.79 | 9.01  | 9.01 |
| 3bgb | 1.4  | 1.48  | 1.80 | 1z1r     | 0.67 | 0.45  | 0.44 |
| 1jmg | 3.55 | 1.75  | 1.75 | 1db1     | 2.01 | 0.24  | 0.38 |
| 2gst | 2.05 | 1.24  | 1.01 | 2avv     | 0.51 | 1.02  | 1.02 |
| 1dzk | 2.08 | 2.69  | 2.55 | 1sdt     | 0.92 | 0.51  | 0.43 |
| 1m2q | 2.88 | 0.67  | 4.93 | 3b65     | 3.66 | 0.38  | 0.40 |
| 2e7f | 0.8  | 1.37  | 4.09 | 1xow     | 3.21 | 0.21  | 0.11 |

|      |      |       |      |      |      |       |      |
|------|------|-------|------|------|------|-------|------|
| 2flr | 2.98 | 0.6   | 1.20 | 2ayr | 0.94 | 0.41  | 0.85 |
| 2p7a | 4.45 | 0.26  | 0.20 | 1bv7 | 4.4  | 0.33  | 0.42 |
| 2wed | 0.7  | 1.99  | 0.76 | 2aqu | 0.5  | 9.74  | 8.91 |
| 1g32 | 2.78 | 1.99  | 0.64 | 2r6w | 3.83 | 0.35  | 1.19 |
| 1o2z | 0.43 | 1.88  | 4.13 | 2z4b | 5.88 | 0.36  | 0.34 |
| 2qnq | 3.37 | 0.53  | 1.47 | 2p95 | 1.52 | 0.4   | 0.32 |
| 1nc1 | 1.62 | 0.44  | 0.80 | 1ebz | 1.22 | 9.52  | 0.00 |
| 2fgv | 1.55 | 10.05 | 0.05 | 1ksn | 0.25 | 0.62  | 0.58 |
| 1ppc | 0.32 | 1.53  | 1.53 | 1met | 1.25 | 0.39  | 0.30 |
| 2i4j | 2.3  | 2.3   | 2.30 | 2o4r | 3.11 | 0.56  | 0.64 |
| 1d6v | 0.33 | 2.46  | 4.15 | 1hsh | 1.14 | 0.63  | 0.65 |
| 1yc1 | 2.35 | 0.65  | 1.12 | 1qbs | 1.92 | 0.32  | 0.40 |
| 1xhy | 2.86 | 0.33  | 0.30 | 2r6y | 4.46 | 0.25  | 1.00 |
| 2qhm | 3.52 | 0.34  | 0.36 | 1hvr | 0.39 | 0.35  | 0.35 |
| 1v2k | 3.34 | 0.5   | 0.45 | 2bys | 1.9  | 0.36  | 0.61 |
| 2bt9 | 4.27 | 0.24  | 0.30 | 2g94 | 3.2  | 8.77  | 8.77 |
| 2qbu | 2.25 | 0.7   | 0.63 | 1dmp | 1.22 | 0.4   | 0.55 |
| 1owe | 3.24 | 0.33  | 0.81 | 1df8 | 2.05 | 0.37  | 0.70 |
| 2aj8 | 0.72 | 0.46  | 0.63 | 1eby | 2.36 | 0.48  | 0.62 |
| 1wcq | 3.92 | 0.95  | 0.94 | 1mrw | 2.57 | 0.29  | 1.38 |
| 2ok1 | 0.53 | 3.2   | 2.06 | 2vh6 | 1.05 | 0.68  | 1.33 |
| 3bgz | 2.43 | 0.66  | 0.40 | 1z6e | 0.95 | 0.89  | 1.28 |
| 1pbq | 3.8  | 0.18  | 0.33 | 2std | 4.32 | 0.57  | 1.17 |
| 3bfu | 4.71 | 0.55  | 1.03 | 2drc | 3.78 | 1.06  | 4.04 |
| 1lag | 4.22 | 0.41  | 0.26 | 1hxb | 1.42 | 9.63  | 9.63 |
| 1wdn | 4.69 | 0.61  | 0.84 | 1hvl | 0.32 | 8.63  | 8.63 |
| 1wm1 | 3.39 | 0.9   | 1.71 | 1bv9 | 2.73 | 0.34  | 0.34 |
| 2q89 | 3.76 | 0.93  | 0.98 | 1bxo | 2.47 | 0.38  | 0.80 |
| 3ebl | 3.25 | 0.37  | 0.54 | 1d4h | 1.17 | 0.95  | 0.89 |
| 2bal | 2.22 | 0.37  | 0.60 | 1sdu | 0.96 | 0.3   | 0.42 |
| 1w3j | 4.31 | 2.32  | 2.19 | 1sr7 | 2.6  | 0.32  | 0.39 |
| 2qbr | 1.51 | 5.4   | 1.31 | 2o4j | 3.66 | 1.83  | 1.85 |
| 3cj5 | 3.18 | 0.66  | 3.09 | 2p16 | 2.12 | 0.28  | 0.38 |
| 3ckp | 2.98 | 0.52  | 0.54 | 1y6r | 2.55 | 0.3   | 0.29 |
| 1c5q | 3.9  | 0.3   | 0.42 | 2qi3 | 2.41 | 1.13  | 1.00 |
| 1ela | 0.09 | 2.36  | 2.23 | 2qi7 | 1.69 | 1.95  | 1.33 |
| 1o2o | 1.21 | 0.72  | 0.67 | 1qbu | 3.94 | 0.65  | 0.68 |
| 1hbv | 1.96 | 8.31  | 8.31 | 1hvs | 1.37 | 8.07  | 8.07 |
| 1hms | 3.37 | 1.31  | 3.73 | 1kzk | 1.91 | 0.48  | 1.33 |
| 1i7z | 2.3  | 0.46  | 2.27 | 2qi4 | 3.3  | 1.01  | 1.32 |
| 1usk | 4.64 | 0.25  | 1.23 | 2o4k | 0.3  | 11.14 | 0.05 |
| 2o2u | 2.51 | 2.34  | 0.54 | 1msm | 0.89 | 1.22  | 0.38 |
| 1syh | 2.04 | 0.81  | 0.87 | 5std | 3.96 | 0.49  | 0.53 |
| 2cgf | 4.46 | 0.36  | 0.24 | 2o4s | 0.79 | 10.91 | 0.79 |
| 1o5a | 1.05 | 1.37  | 1.96 | 1n46 | 3.16 | 0.4   | 0.35 |

|      |      |      |      |      |      |       |      |
|------|------|------|------|------|------|-------|------|
| 1fh9 | 2.88 | 0.41 | 0.45 | 2f81 | 1.57 | 6.64  | 1.59 |
| 2b07 | 0.58 | 2.75 | 2.59 | 1qbr | 1.05 | 0.32  | 0.89 |
| 1gt3 | 4.14 | 5.37 | 4.89 | 2qi6 | 3.52 | 0.25  | 0.49 |
| 1m2r | 2.58 | 4.85 | 0.27 | 3djk | 3.03 | 0.44  | 0.27 |
| 1r5y | 3.41 | 0.22 | 0.08 | 3cs7 | 3.91 | 0.46  | 2.18 |
| 1f4g | 1.17 | 1.21 | 1.12 | 2pk5 | 3.78 | 12.21 | 2.21 |
| 1gpn | 2.21 | 0.47 | 0.43 | 7std | 4.46 | 0.37  | 0.62 |
| 1rpj | 3.37 | 0.23 | 0.31 | 1hwx | 2.24 | 10.89 | 9.01 |
| 1dl7 | 4.28 | 1.35 | 1.35 | 2qi5 | 3.94 | 3.96  | 3.96 |
| 3cj4 | 3.88 | 2.09 | 1.93 | 2pk6 | 1.49 | 2.26  | 2.16 |
| 1ct8 | 0.51 | 5.9  | 5.90 | 1hvi | 1.21 | 4.87  | 4.87 |
| 1g74 | 3.99 | 5.49 | 4.73 | 1hvk | 0.02 | 7.07  | 7.07 |
| 1gt4 | 2.41 | 5.21 | 3.11 | 1mq6 | 2.73 | 0.47  | 1.44 |
| 1qyl | 3.57 | 0.7  | 0.56 | 2i4v | 1.14 | 8.38  | 8.38 |
| 1zhy | 3.34 | 0.66 | 0.78 | 1hpx | 1.47 | 7.98  | 7.98 |
| 2nt7 | 1.74 | 9.76 | 7.40 | 2q5k | 2.57 | 9.29  | 9.29 |
| 2oxy | 3.86 | 2.52 | 3.87 | 2hb3 | 1.27 | 0.35  | 0.43 |
| 3d0b | 0.2  | 0.42 | 0.94 | 1hvj | 1.97 | 6.17  | 6.17 |
| 1dhj | 1.79 | 1.21 | 1.00 | 2i0a | 0.99 | 11.13 | 1.02 |
| 1hmr | 3.58 | 4.21 | 4.04 | 2i4u | 0.87 | 4.73  | 4.73 |
| 1n4h | 3.94 | 0.65 | 0.57 | 2i4w | 2.36 | 3.14  | 3.47 |
| 1yc4 | 3.91 | 0.87 | 0.58 | 2i4d | 0.86 | 10.95 | 0.36 |
| 2bok | 0.58 | 0.7  | 0.42 | 1y6q | 2.82 | 0.35  | 0.31 |
| 2pwc | 0.68 | 0.93 | 0.92 | 2i4x | 1.49 | 1.09  | 1.02 |
| 1kli | 1.92 | 3.5  | 2.11 |      |      |       |      |
